# Supplementary material for: Single-Cell RNA Sequencing of hESC-Derived 3D Retinal Organoids Reveals Novel Genes Regulating RPC Commitment in Early Human Retinogenesis
Source: PubMed Central journal article supplement — Stem Cell Reports. 2019 Sep 19;13(4):747–60. doi: 10.1016/j.stemcr.2019.08.012 (PMC6829752; doi:10.1016/j.stemcr.2019.08.012), 2019-09-19
Supplement: mmc4.pdf [file mmc4.pdf]

# Single-Cell RNA Sequencing of hESC-Derived 3D Retinal Organoids Reveals Novel Genes Regulating RPC Commitment in Early Human Retinogenesis

Xiying Mao,<sup>1,7</sup> Qin An,<sup>2,7</sup> Huiyu Xi,<sup>4</sup> Xian-Jie Yang,<sup>5</sup> Xiangmei Zhang,<sup>5</sup> Songtao Yuan,<sup>1</sup> Jinmei Wang,<sup>6</sup> Youjin Hu,<sup>3,\*</sup> Qinghuai Liu,<sup>1,\*</sup> and Guoping Fan<sup>2,\*</sup>

<sup>1</sup>Department of Ophthalmology, The First Affiliated Hospital of Nanjing Medical University, Nanjing 210029, China

<sup>2</sup>Department of Human Genetics, David Geffen School of Medicine, University of California, Los Angeles, 695 Charles Young Drive South, Los Angeles, CA 90095, USA

<sup>3</sup>State Key Laboratory of Ophthalmology, Zhongshan Ophthalmic Center, Sun Yat-sen University, Guangzhou 510060, China

<sup>4</sup>Department of Ophthalmology, Xuzhou First People's Hospital of Xuzhou Medical University, Xuzhou Eye Research Institute, Xuzhou 221002, China

<sup>5</sup>Stein Eye Institute, Molecular Biology Institute, University of California, Los Angeles, CA 90095, USA

<sup>6</sup>Institute of Regenerative Medicine and International Lab of Ocular Stem Cells at Shanghai East Hospital, School of Life Science & Technology, Tongji University, Shanghai 200092, China

<sup>7</sup>Co-first author

\*Correspondence: [huyoujin@gzzoc.com](mailto:huyoujin@gzzoc.com) (Y.H.), [liuqh@njmu.edu.cn](mailto:liuqh@njmu.edu.cn) (Q.L.), [gfan@mednet.ucla.edu](mailto:gfan@mednet.ucla.edu) (G.F.)

<https://doi.org/10.1016/j.stemcr.2019.08.012>

## SUMMARY

The development of the mammalian retina is a complicated process involving the generation of distinct types of neurons from retinal progenitor cells (RPCs) in a spatiotemporal-specific manner. The progression of RPCs during retinogenesis includes RPC proliferation, cell-fate commitment, and specific neuronal differentiation. In this study, by performing single-cell RNA sequencing of cells isolated from human embryonic stem cell (hESC)-derived 3D retinal organoids, we successfully deconstructed the temporal progression of RPCs during early human retinogenesis. We identified two distinctive subtypes of RPCs with unique molecular profiles, namely multipotent RPCs and neurogenic RPCs. We found that genes related to the Notch and Wnt signaling pathways, as well as chromatin remodeling, were dynamically regulated during RPC commitment. Interestingly, our analysis identified that *CCND1*, a G<sub>1</sub>-phase cell-cycle regulator, was coexpressed with *ASCL1* in a cell-cycle-independent manner. Temporally controlled overexpression of *CCND1* in retinal organoids demonstrated a role for *CCND1* in promoting early retinal neurogenesis. Together, our results revealed critical pathways and novel genes in early retinogenesis of humans.

## INTRODUCTION

The human retina is a complicated neural tissue consisting of multiple types of neurons, which are accurately stratified in different layers during retinogenesis to ensure their proper function. All these highly specialized retinal neurons are derived from multipotent retinal progenitor cells (RPCs) (Agathocleous and Harris, 2009). Evidence at the cellular level showed that RPCs generate retinal neurons following the general rule, which is also seen in a variety of neuronal tissues. RPCs first undergo several rounds of proliferation. A subset of proliferating RPCs become neurogenic, exit the mitotic cycle, and migrate toward the correct laminar position. These committed RPCs further differentiate into mature neurons (Baye and Link, 2008).

Previous studies have focused on dissecting the molecular mechanism regulating neurogenesis of different types of retinal neurons. Despite this, our understanding of how human RPCs gain neurogenic competence before the generation of neurons is still limited. First, many prior studies use animal models such as mouse and rat retina, which may not fully recapitulate retinogenic mechanisms in humans. Second, developing retinas contain many types of heterogeneous cells, which complicates the data interpretation based on bulk genomic analysis, such as RNA sequencing (RNA-seq) data of the entire retina. To over-

come these hurdles, we designed experiments by combining single-cell RNA-seq (scRNA-seq) and human embryonic stem cell (hESC)-derived three-dimensional (3D) retinal organoid, which is an *in vitro* model to recapitulate both morphological and molecular features of the developing human retina (Kuwahara et al., 2015; Zhong et al., 2014). Here, we report the transcriptomic analysis of 457 individual cells isolated from neuroretina of 3D retinal organoids harvested at six time points before and after the onset of retinal neurogenesis. Using systematic approaches including single-cell pseudotime analysis, single-cell trajectory reconstruction, and weighted gene coexpression network analysis (WGCNA), we discovered transcription factors (TFs), chromatin remodeling regulators, and signaling pathway that play critical roles in the commitment of multipotent RPCs to neurogenic RPCs.

## RESULTS

### Combination of Single-Cell Transcriptome Analysis and Immunostaining Defined the Time Course of RPC Commitment in hESC-Derived 3D Retinal Organoids

We first generated 3D retinal organoids from hESC cell line H9 using the method reported previously (Kuwahara et al., 2015; Zhong et al., 2014). In brief, hESCs were first

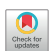

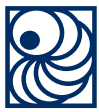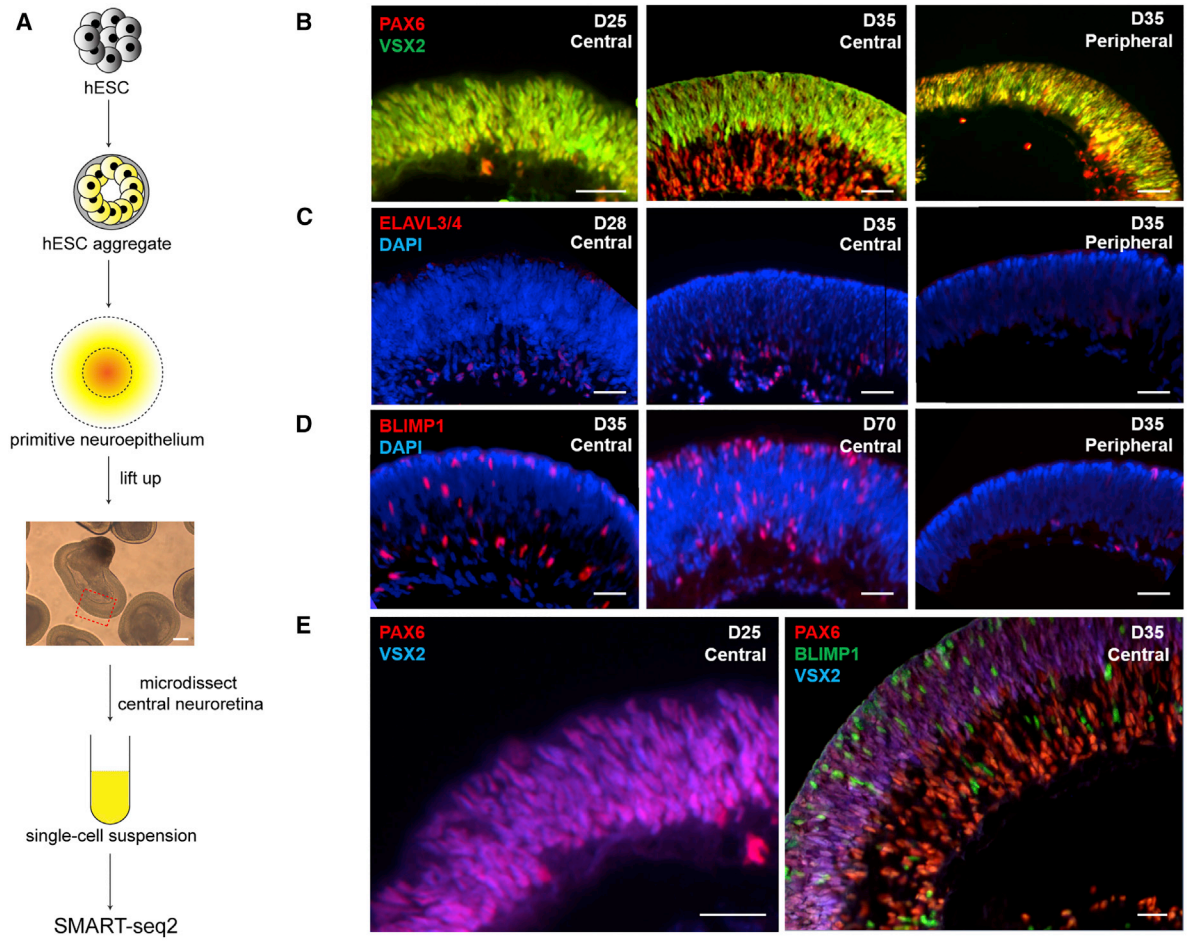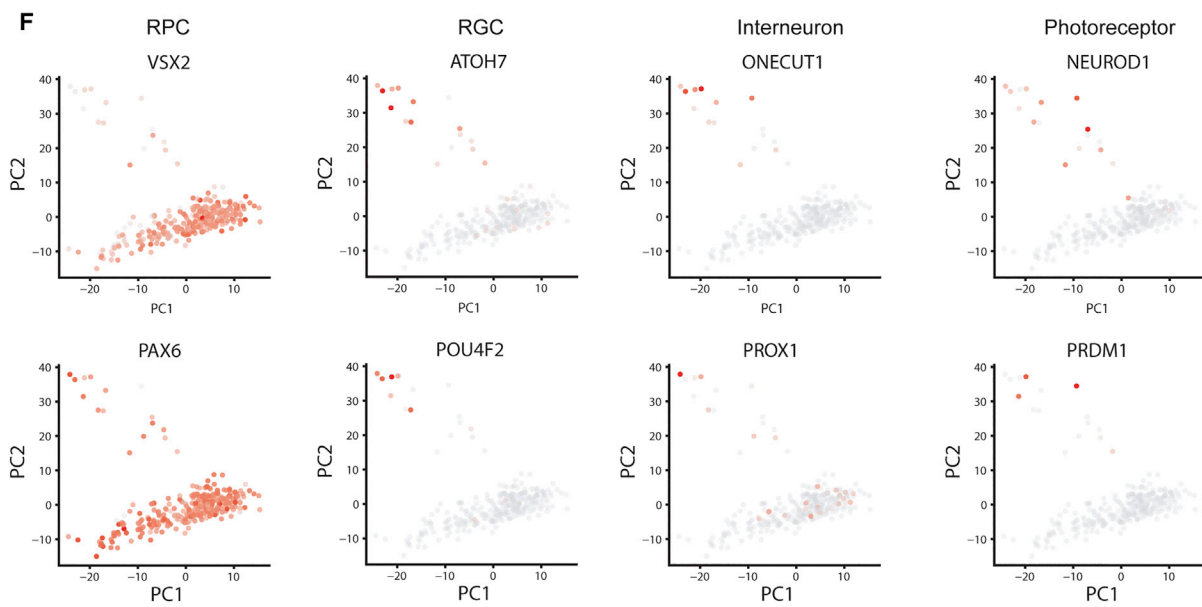

(legend on next page)

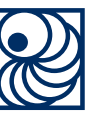

differentiated into neuroepithelium through embryonic body formation, then treated with bone morphogenetic protein 4 (BMP4) to enhance the conversion of primitive neuroepithelium to retina. The neural retinas in the center of neuroepithelium were then mechanically dislodged and cultured in suspension to let them self-organize into 3D-retinal organoids, where production of retinal neurons will automatically occur (Figure 1A).

We then sought to determine the time course of neurogenesis in hESC-derived 3D retinal organoids. Immunostaining showed that RPC-specific markers *VSX2* and *PAX6* were coexpressed throughout hESC-derived 3D optic cup before culturing on day 28 (Figure 1B). After day 28, the expression of *VSX2* started to disappear at the basal side of the central retina, where the cells expressing the retinal ganglion cell (RGC) marker *ELAVL3/4* began to occur at the same time, and the number of *ELAVL3/4*-positive cells gradually increased thereafter (Figure 1C). Photoreceptor precursors labeled by *BLIMP1* first emerged at the basal side at almost the same time when RGCs were generated and gradually accumulated at the apical side, indicating that the neurogenesis was spontaneously initiated at the central part of retinal organoid at day 28 and then expanded from the center to the periphery (Figure 1D). These results were consistent with previous reports, and indicate the high reproducibility of the 3D retinal organoids culture protocol. Together, these results confirmed that neurogenesis was initiated in 3D retinal organoids at day 28.

We then tried to define the transcriptomic dynamics during RPC commitment. We isolated single cells from the central neuroretina of the 3D optic cup at six time points from day 25 to day 35, which spans RPC proliferation, RPC commitment, and onset of retinal neurogenesis (Figure 1E). We profiled transcriptome in 457 single cells, with 3 million reads per cell on average. In total 306 cells passed quality control, with 0.65 million reads (SD = 0.18 million) uniquely mapped per cell (Picelli et al., 2014).

We were able to detect expression of 16,348 genes across 306 cells (genes have more than one read in at least 10% of cells) (Figures S1A and S1B). Principal component analysis (PCA) of normalized and log-transformed transcriptomic data showed that cells were clustered by cell-cycle phase, but not the culture day of the organoids (Figure S1C). Indeed, the expression of cell-cycle-related genes was highly variable, and the principal loading score showed that cell-cycle-related genes were the primary source of the heterogeneity within this cell population (Figure S1D). These results were consistent with the fact that RPCs are highly proliferative, and suggested that the transcriptomic dynamics underlying RPC commitment were largely masked by cell-cycle variation.

To reveal the transcriptomic dynamics driven by RPC commitment, we removed cell-cycle bias from transcriptome data. As expected, PCA after cell-cycle bias correction showed that cells were no longer clustered by their cell-cycle phase. Instead, a majority of cells were clustered in a band-shaped group with some cells shifting away (Figure S1E). The cells outside the band-shaped subpopulation expressed multiple neuronal lineage markers, such as *ATOH7* and *POU4F2* for RGC differentiation, *ONECUT1* and *PROX1* for interneuron differentiation, and *NEUROD1* and *PRDM1* for photoreceptor differentiation, indicating their neuronal identity. The cells in the band-shaped cluster were therefore annotated as RPCs due to their coexpression of RPC markers, including *VSX2* and *PAX6* (Figure 1F). Interestingly, we found that the RPCs collected from organoids before day 28 were separated from those obtained after day 28. Together, these results suggested a major transcriptomic transition occurred in RPCs at the onset of retinal neurogenesis.

#### Gene Coexpression Analysis Identified Novel Genes Promoting Neurogenic Competence in RPCs

Transient expression of neuronal-fate determinant *ASCL1* in RPCs can promote the neurogenic competence and

### Figure 1. Immunostaining Characterization of the Onset of Retinal Neurogenesis in hESC-Derived 3D Retinal Organoids

(A) Schematic diagram of the differentiation of hESC-derived 3D retinal organoids and the scRNA-seq library construction strategy. Scale bar, 50  $\mu$ m.

(B–E) Immunostaining of representative genes in 3D retinal organoid at different time points. Scale bars, 25  $\mu$ m. (B) *PAX6* and *VSX2* colocalized in all cells in central retina at day 25. At day 35, cells at the basal side of central retina only expressed *PAX6*, but not *VSX2*, while *PAX6* and *VSX2* were still colocalized in all cells of the peripheral retina at day 35. (C) At day 28, *ELAVL3/4*-positive cells started to present at the basal side of central retina, and increased in number over time. At the peripheral retina, the expression of *ELAVL3/4* was absent from day 25 to day 35. (D) *BLIMP1*-positive cells first appeared in the basal side of the central retina and migrated to the apical side. However, minimal expression of *BLIMP1* was observed in the peripheral retina from day 25 to day 35. (E) Staining of RPC markers and neuronal markers at day 25 and day 35. In the central retinal region, all cells were RPC, while early-born retinal neurons were generated by day 35.

(F) Expression of representative cell-type-specific genes. Red indicates high expression and gray indicates low expression. The cells in the major band-shaped cluster coexpress *VSX2* and *PAX6*, indicating their retinal progenitor cell identity. Cells shifting away express neuron-specific genes, indicating their neuronal identity.

See also Figure S1.

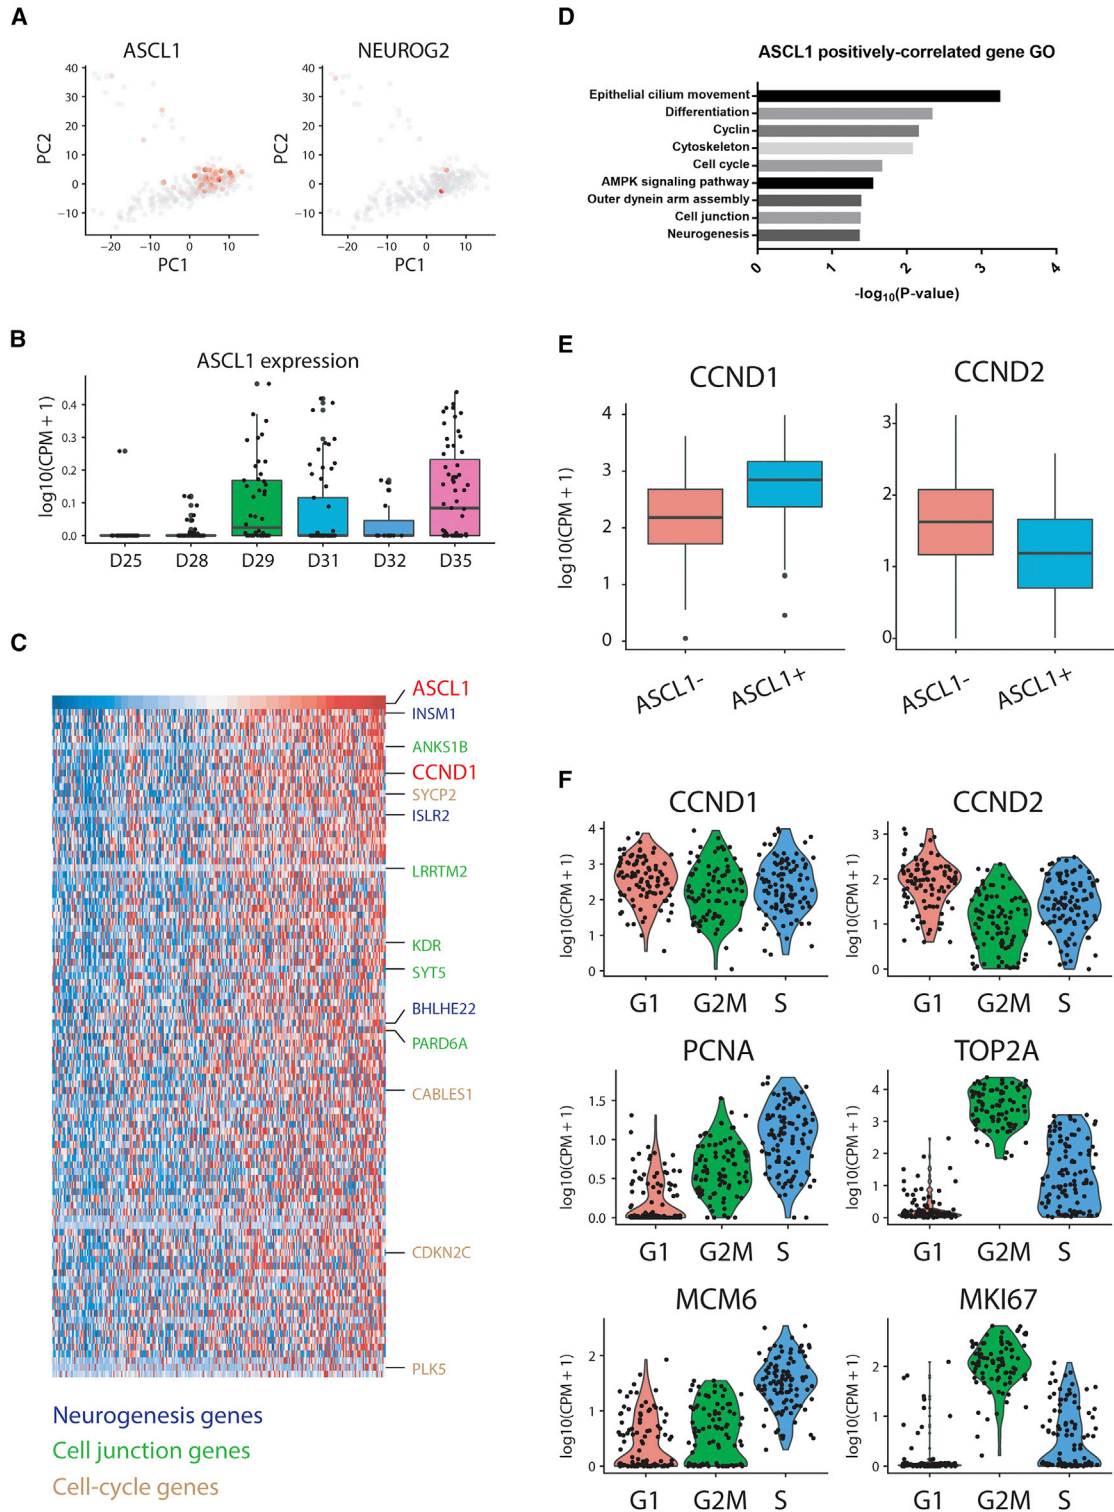

**Figure 2. Identification of Novel Neurogenic Regulators in hESC Retinoids**

(A) PCA plot showing the expression of *ASCL1* and *NG2*, two proneuronal transcription factors (TFs) regulating RPC commitment and neurogenesis.

(B) Box plot showing *ASCL1* expression in RPCs collected at different time points. *ASCL1* started to express in RPCs at day 28 when neurogenesis in retinal organoids begins.

(legend continued on next page)



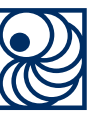

direct RPC to neuronal fate (Brzezinski et al., 2011). In our data, we found that *ASCL1* was exclusively expressed in the RPCs collected from organoids at day 28 and later on, which is consistent with the onset timing of RPC commitment in human retinal organoids (Figures 2A and 2B). We then sought to identify additional genes that promote neurogenic competence by performing coexpression analysis between *ASCL1* and all other 16,347 expressed genes in RPCs (Figure 2C). Gene ontology analysis of the top 100 genes with the strongest correlation with *ASCL1* was enriched in gene ontology terms including cell cycle, cell junction, and neurogenesis (Figures 2D and S2). We found that *NGN2* was among the top genes that positively correlated with *ASCL1* ( $r = 0.41$ , adjusted  $p < 0.05$ ), which is consistent with its function in promoting neurogenesis during retinal development (Hufnagel et al., 2010). We also found many other genes such as *INSM1*, *BHLHE22*, and *ISLR2* that are highly correlated with *ASCL1* expression in RPCs (Figure 2C and Table S1). These results suggested the potential function of these *ASCL1* coexpressing genes in regulating RPC commitment and retinal neurogenesis.

Among *ASCL1* coexpressing genes, we found that *Cyclin D1* (*CCND1*) exhibited the 10th top strongest positive correlation with *ASCL1* (Figure 2C). Indeed, *ASCL1*-positive RPCs have higher expression level of *CCND1* compared with *ASCL1*-negative RPCs (Figures 2E and 3A). Surprisingly, although *CCND1* is conventionally known as a G<sub>1</sub> cell-cycle regulator and exhibits cell-cycle specific expression at G<sub>1</sub> phase, we found that in RPCs, *CCND1* is expressed in a cell-cycle-independent manner. This is in stark contrast to other classical cell-cycle regulators, such as *CCND2* for G<sub>1</sub> phase, *TOP2A* and *Ki67* for G<sub>2</sub>/M phase and *PCNA* and *MCM6* for S phase, which were specifically expressed in their corresponding cell-cycle phases (Figure 2F). Additionally, immunostaining of day-35 retinal organoids showed that expression of *CCND1* was higher in the basal side of central neuroretina, where *Ki67*, the pan-cell-cycle marker, was low (Figure 3A). Together, these results indicated that *CCND1* could be involved in RPC commitment in a cell-cycle-independent manner.

We then examined the function of *CCND1* in RPC commitment, using a Tet-On inducible system, which

can overexpress ectopic *CCND1* upon the addition of doxycycline. Using this system, we specifically overexpressed *CCND1* in retinal organoids from day 28 to day 32. This temporal-specific overexpression of *CCND1* allows us to accurately assess the function of *CCND1* during early retinogenesis (Figure 3B). We found that *CCND1* overexpression greatly increased the number of neuronal cells labeled by *ISLET1* at day 32, while the proportion of photoreceptor precursors labeled by *BLIMP1* appeared to be unaltered (Figures 4A–4C). These results indicated that *CCND1* overexpression induced more cells to leave the cell cycle and commit to certain neuronal fate. Notably, overexpression of *CCND1* also increased *ASCL1*-expressing cells, indicating that *CCND1* may promote the expression of *ASCL1* directly or indirectly (Figure 3C). Similar results were obtained in other hESC lines (Figure S3). Together, these results demonstrated a novel function of *CCND1* in promoting RPC commitment and subsequent neurogenesis in a cell-cycle-independent manner.

#### Unbiased Clustering Identified Transcriptomic Transition Associated with Neurogenic Competence in RPCs during Early Retinogenesis

We have shown that RPCs before and at day 28 were separated from RPCs collected after day 28, indicating that a major transcriptomic transition occurs at day 28. We hypothesize that cell subgroups within the RPC population could correspond to different phases of RPC progression. To identify the subgroups within RPCs, we performed unbiased clustering using a shared nearest-neighbor modularity optimization-based clustering algorithm on all 309 single cells, and identified six clusters (Figure 4A and Table S2). A biologically meaningful cell subgroup should express a unique set of marker genes compared with other cells. Cluster 6 contains the cells shifted out from the RPC population, and expressed a distinctive set of marker genes compared with the other five clusters. Functional enrichment of these marker genes showed that they are highly associated with neuronal identity, suggesting that cluster-6 cells are postmitotic neurons. The other five clusters collectively resemble RPCs. However, from these five clusters, we can identify two distinct sets of marker genes,

(C) Heatmap showing the expression of top 100 genes with the strongest positive correlation with *ASCL1* in RPCs. Correlation analysis identified genes that coexpress with *ASCL1* in RPCs. Genes with known function in neurogenesis, cell-cycle junction, and cell cycle are highlighted by different colors.

(D) Gene ontology analysis showed the functional enrichment of the top 100 genes with the strongest positive correlation with *ASCL1* in RPCs.

(E) *CCND1* showed a strong positive correlation with *ASCL1* in RPCs. *ASCL1*-positive RPCs showed higher expression of *CCND1*. On the contrary, *ASCL1*-positive RPCs have lower expression of *CCND2*, the homolog of *CCND1*.

(F) Violin plot shows the expression of *CCND1* and other representative cell-cycle-related genes in RPCs at different cell-cycle phases. *CCND1* expression does not show a significant difference between different cell-cycle phases.

See also Figure S2.

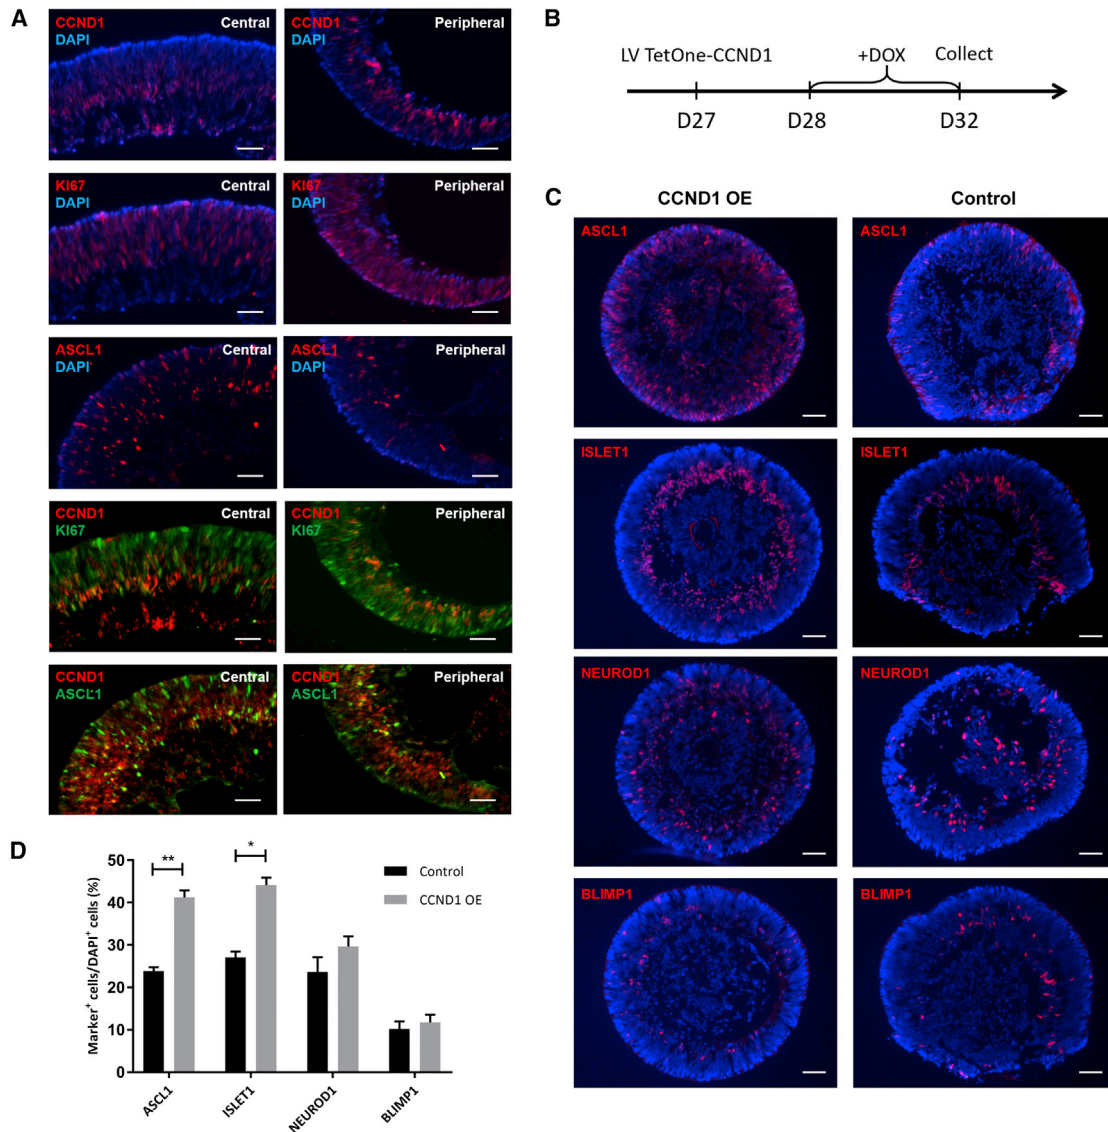

### Figure 3. Characterization of CCND1 Function in RPC Commitment

(A) Immunostaining of CCND1, Ki67, and ASCL1 in the central and peripheral day-35 retinal organoids. Scale bars, 25  $\mu$ m.

(B) Schematic presentation of CCND1 inducible overexpression experiment. Retinal organoids were transduced by lentiviral particles carrying a Tet-On CCND1 overexpression system that can overexpress ectopic CCND1 upon the addition of doxycycline (Dox). We specifically overexpress CCND1 in retinal organoids from day 28 to day 32 by adding Dox at day 28 and removing Dox after day 32.

(C) Expression patterns of ASCL1, ISLET1, NEUROD1, and BLIMP1 in CCND1-overexpressing (CCND1 OE) retinal organoids and control organoids at day 32. Scale bars, 50  $\mu$ m.

(D) Quantification of Marker<sup>+</sup> cells in CCND1 OE retinal organoids and control organoids (mean  $\pm$  SD;  $n \geq 5$  organoids from two differentiations) at day 32. \* $p < 0.05$ , \*\* $p < 0.001$  (unpaired t test).

See also [Figure S3](#).

indicating that there are only two biologically meaningful subpopulations within RPCs (Figures 4B and 4C). The majority of RPCs in clusters 1, 3, and 5 were harvested from the central retina after day 28 when retinal neurogenesis was initiated (Figure S4A). Gene ontology of marker genes of these three clusters were enriched in neurogenesis, neuron

projection, and nervous system development (Figure 4D), and many genes related to the neuronal development network, such as *ASCL1*, *RTN4*, *GPM6A*, *EFNB2*, *GPM6B*, *FZD3*, *RUFY3*, and *ISLR2*, were found to be the shared marker genes for these three clusters. We also found that many marker genes of these three clusters, such as *DCX*,

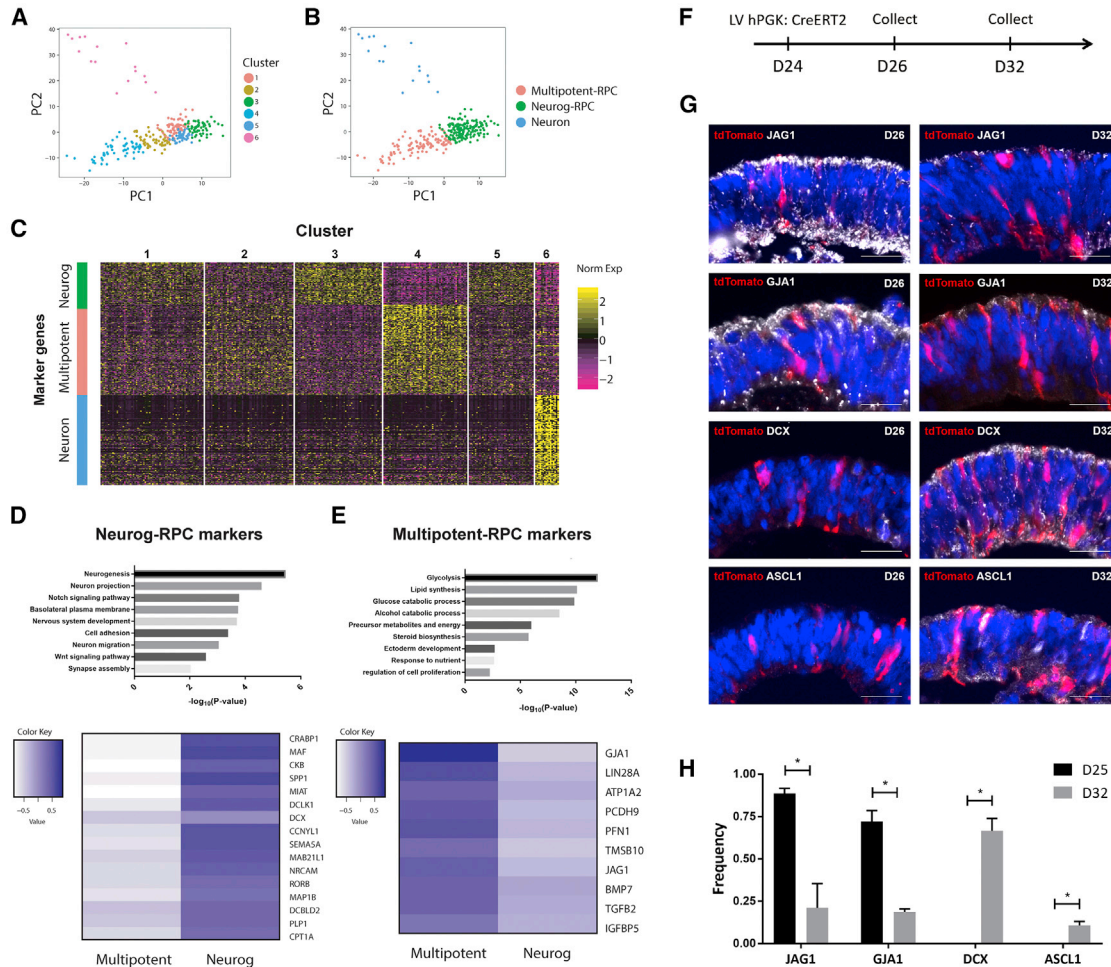

**Figure 4. Analysis of Marker Genes in Multipotent and Neurogenic RPCs**

(A) Unbiased clustering initially classified cells into six clusters. Cluster 6 contains all neurons. Clusters 1 through 5 collectively contain all RPCs.

(B) PCA plot showing the biological meaningful cell subgroups. Although six clusters were initially identified, there were only three biologically meaningful subgroups, each of which express a unique set of marker genes compared with others, which is shown in (C).

(C) Heatmap showing the marker genes identified for each of the six clusters. Cluster 6 expresses a unique set of marker genes related to neuronal identity. Clusters 1, 3, and 5 express the same set of marker genes, whereas clusters 2 and 4 express the other set of markers.

(D and E) Top: functional enrichment of genes significantly highly expressed in neurogenic RPCs (D) and multipotent RPCs (E). Bottom: heatmaps showing the average expression of representative marker genes in neurogenic RPCs (D) and multipotent RPCs (E).

(F) Schematic presentation of RPC lineage tracing. AAVS1-loxp-3Stop-loxp-tdTomato H9 ESC-derived retinal organoids were transduced with hPGK:CreERT2-expressing lentivirus in the combination of low-dose 4-hydroxytamoxifen to achieve sparse labeling of multipotent RPC on day 24 and collected on days 26 and 32, respectively.

(G) Coimmunostaining of tdTomato with multipotent RPC markers (JAG1 and GJA1) and neurogenic RPC markers (DCX and ASCL1) at day 26 and day 32, respectively. Scale bars, 25  $\mu$ m.

(H) Quantification of Marker<sup>+</sup> cells among tdTomato<sup>+</sup> cells (mean  $\pm$  SD; n  $\geq$  5 organoids from two differentiations). \*p < 0.001 (unpaired t test).

See also Figure S3.

*DCLK1*, *SEMA5A*, and *NRCAM* (Figure 4D), were also highly expressed in neuronal cells. Together, these results suggest the neurogenic competence of these RPCs. We therefore merged clusters 1, 3, and 5 into one subtype and termed

them neurogenic RPCs. Interestingly, *ASCL1* and *NGN2* were expressed in a subset of these neurogenic RPCs, suggesting a transition from initial neurogenic RPCs to an intermediate state primed for neurogenesis.



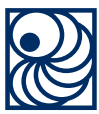

Clusters 2 and 4 only contained RPCs collected before and on day 28, and shared another set of marker genes. These marker genes were strongly enriched in metabolic process-associated terms, such as glycolysis and lipid synthesis (Figure 4E). The high expression of metabolism-associated genes is also reported in quiescent adult neural stem cells (NSCs), and metabolism-associated genes were downregulated upon the activation of quiescent NSCs (Dulken et al., 2017). We also found that known marker genes in NSCs, such as *GJA1* and *ATP1A2*, were highly expressed in these RPCs compared with neurogenic RPCs (Figure 4E). The adhesion molecule *PCDH9* and cytoskeletal proteins *PFN1* and *TMSB10*, molecules involved in the balance of NSC quiescence and activation, were also specifically expressed in these RPCs (Morizur et al., 2018; Saffary and Xie, 2011) (Figure 4E). Contrary to quiescent NSCs, self-renewal genes, such as *LIN28A* and *LIN28B*, were highly expressed in these RPCs. Notably, secreted signaling molecules, including *JAG1*, *BMP7*, *TGFβ2*, and *IGFBP5*, were also among the marker genes of these clusters, which were reported to be exclusively localized in the peripheral retina and ciliary margin (Trimarchi et al., 2009). Together, these results indicated the molecular resemblance of these RPCs to adult NSCs and the non-neurogenic RPCs in the peripheral retina. We therefore annotated this RPC subgroup as multipotent RPCs.

To clarify the transition between multipotent RPC and neurogenic RPCs, we used an AAVS1-loxp-3Stop-loxp-tdTomato hESC line for lineage tracing. We transduced hPGK:CreERT2-expressing lentivirus in the combination of low-dose 4-hydroxytamoxifen to achieve sparse labeling of multipotent RPCs at day 24 (Figure 4F). At day 26, the majority of labeled cells were marked by multipotent RPC markers, such as *JAG1* and *GJA1*. By day 32, almost all tdTomato<sup>+</sup> cells were doublecortin (DCX) positive, while *JAG1* and *GJA1* were greatly downregulated, indicating the molecular transition from multipotent RPCs to neurogenic RPCs. In addition, a subset of labeled cells started to express *ASCL1*, which primes for further differentiation (Figures 4G and 4H). Notably, the neurogenic RPC marker distribution exhibited a central-to-peripheral downgraded pattern, while multipotent markers were preferentially located at the peripheral domain, also suggesting the more advanced state of neurogenic RPCs than multipotent RPCs along the neurogenic path (Figure S4B).

### WGCNA Analysis Identified Gene-Regulatory Networks in Early Retinogenesis

To systematically understand the dynamics of the genetic program in early retinogenesis, we performed the WGCNA on our scRNA-seq data. WGCNA is an unsupervised method that can identify coexpressed gene modules that consist of genes that are likely involved in similar biological

progress (Langfelder and Horvath, 2008). We identified three modules that are composed of genes specifically upregulated in multipotent RPCs, neurogenic RPCs, and neurons, respectively (Figure S5A). Using the WGCNA measure of intramodular gene connectivity, we found different hub genes across the three stage-specific modules. Hub genes are the genes centrally located within a gene module. They have a tight coexpression relationship between many genes, and therefore could have important regulatory roles. *GJA1* and *ENO1* were identified as hub genes in multipotent RPC module (Figure S5C). Many known neurogenic TFs, including *ATOH7*, *ONECUT2*, and *DLX2*, were among the intramodular hub genes for the neuronal module (Figure S5D). Interestingly, for the neurogenic RPC module, *FZD5* was highlighted as the hub gene in the network (Figure S5B). Previous results showed that *FZD5* has different functions through different signaling pathways in different species. For example, *FZD5* homolog *Fz5* in *Xenopus laevis* mediates canonical Wnt signaling, and its knockdown causes RPC hypoproliferation. However, in zebrafish, *FZD5* homolog mediates noncanonical Wnt signaling and promotes eye field formation (Agathocleous and Harris, 2009). In mice, *Fzd5* does not influence RPC proliferation but instead regulates cell survival and neurogenesis (Liu et al., 2012). Together, these results suggested the possible role for *FZD5* in regulating RPC commitment specifically in human retinogenesis.

### Pseudotime Analysis Identified Genes Dynamically Changed during the Progression of RPC Competence

To further delineate the mechanism underlying the RPC progression, we reconstructed the development pseudotime for each RPC by applying a principle curve analysis to RPCs and identifying genes whose expression exhibit progressive change along the pseudotime using Spearman's correlation (Figures 5A, 5B, and S6). Gene set enrichment of top 100 correlated genes showed association to Notch signaling and canonical Wnt pathway (Figure 5C). Notch components (*NOTCH1*, *HES1*) and positive regulators (*DTX4*, *TTYH1*) increased gradually during RPC progression (Figure 5D). Notch signaling is a highly conservative pathway functioning in lateral inhibition of neurogenesis and progenitor maintenance (Zhang et al., 2018). Thus, the enhancement of Notch signaling at the initiation of retinal neurogenesis indicated its noncanonical role in promoting the neurogenic competence of RPCs, which is consistent with the observation of a dramatic loss of NGN2<sup>+</sup> cells in the central retina of Notch signaling DNA-binding protein Rbpj mutant (Maurer et al., 2014). In contrast, Wnt/β-catenin pathway was negatively regulated by the upregulation of Wnt signaling inhibitor of *DKK3* and negative targets (*ERG1*, *SOX9*, and *CDH2*) (Figure 5D). Consistently in previous studies, β-catenin



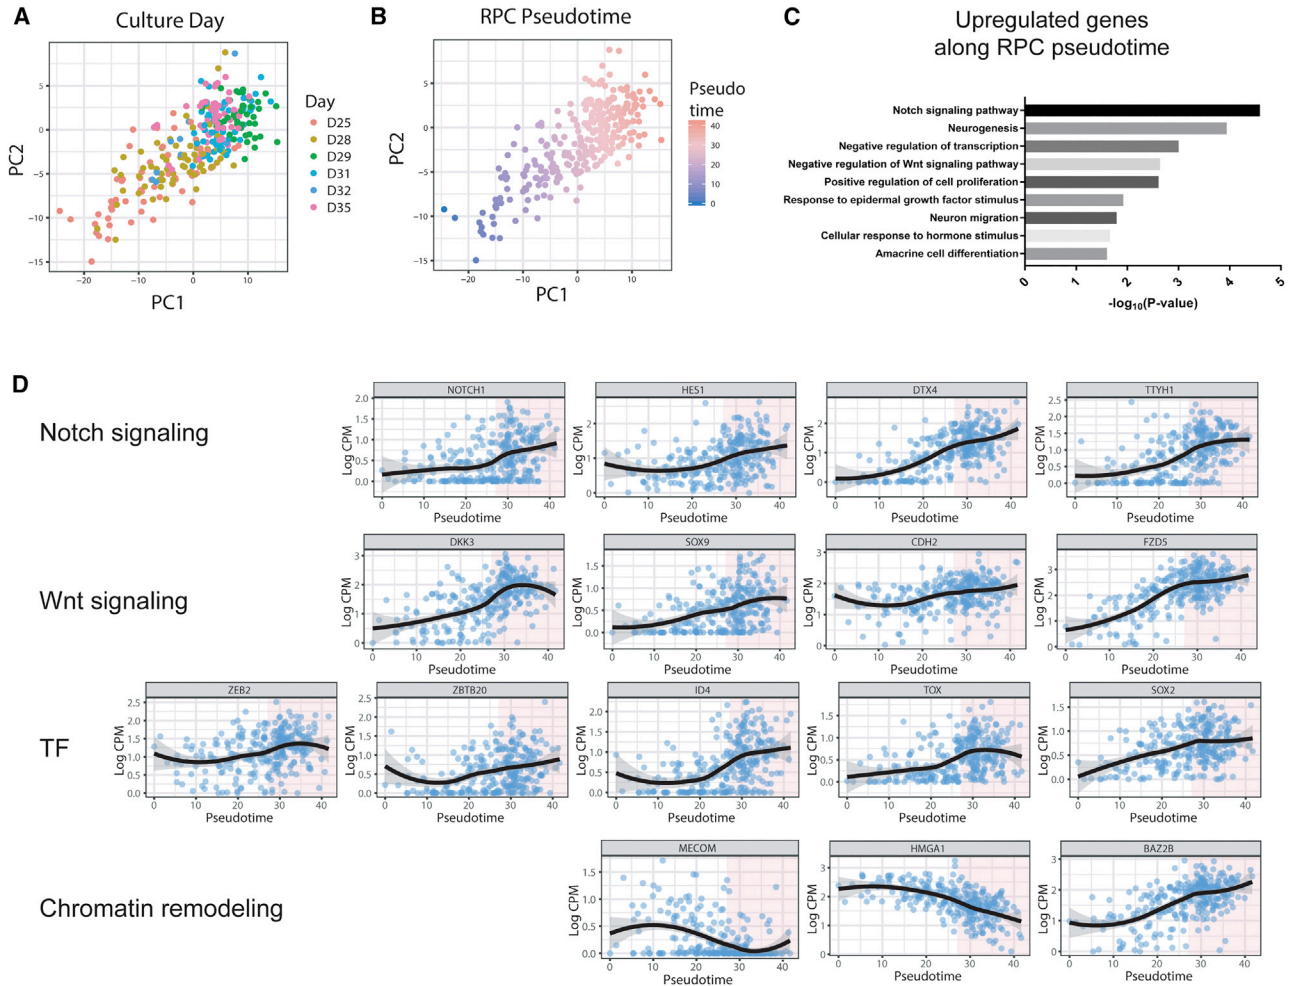

**Figure 5. Pseudotime Analysis of RPC Progression Using Principal Curve Method**

(A and B) To focus on the expression dynamics in RPCs, we inferred developmental pseudotime (B) from culture days (A) using RPCs by the principle curve (PC) method.

(C) Enriched gene ontology terms and p values of positively correlated genes with pseudotime.

(D) Expression change of genes that were dynamically regulated in RPCs during developmental pseudotime. These genes were related to Notch signaling, Wnt signaling, and chromatin remodeling, and some of them were TFs.

See also [Figure S6](#).

expression decreased along the peripheral to central gradient, and the inhibition of canonical Wnt signaling by *Dkk3* was also found to promote the retinogenic process ([Bharti et al., 2012](#)).

We also found many TFs that were correlated with the RPC progression pseudotime. For example, TFs belonging to transcriptional repressors, such as *ZEB2*, *ZBTB20*, and *ID4* ([Figure 5D](#)), exhibited upregulated expression. *Zeb2* was reported to promote the timely differentiation of retinal interneurons, possibly through the repression of the TGFβ/Smad pathway, while *Zbtb20* and *Id4* determined the balance between neurogenic and gliogenic output by preventing premature neurogenesis ([Bedford](#)

[et al., 2005](#); [Menuchin-Lasowski et al., 2016](#); [Nagao et al., 2016](#)). Another family of TFs, which contains the high-mobility group (HMG) box that maintains proliferative progenitors in the neurogenic region and controls the temporal regulation of neurogenesis, such as *TOX*, *SOX2*, and *SOX9*, was also upregulated in the RPC lineage ([Artegiani et al., 2015](#); [Poche et al., 2008](#)). Interestingly, several chromatin structure regulators were also dynamically changed during RPC progression ([Figure 5D](#)). For example, *HMG1* is required for the maintenance of an open chromatin state and was downregulated along RPC progression ([Kishi et al., 2012](#)). *BAZ2B*, which is a component of the chromatin remodeling complex and has been



demonstrated to play a role in transcriptional activation via histone acetylation, was significantly upregulated (Oppikofer et al., 2017). *MECOM* is widely involved in the chromatin remodeling that leads to transcriptional repression and is downregulated during RPC progression (Cattaneo and Nucifora, 2008). These results suggested that chromatin remodeling is actively involved in early retinogenesis.

### Single-Cell Trajectory Analysis Identified Genes Transiently Activated along the Trajectory of RPC Commitment to Early-Born Retinal Subtypes

So far, the analysis of RPC progression has been done by comparing transcriptomes between discrete cell populations. To reveal gene-expression dynamics over the continuous development process, we reconstructed a cell-developmental trajectory using Monocle2 and analyzed the gene-expression change along pseudotime (Qiu et al., 2017). Monocle2 identified a bifurcating trajectory with three branches. One branch specifically expressed neuronal-fate TFs, such as *ATOH7*, *PRDM1*, *ONECUT1*, and *PROX1*, indicating their neuronal identity (Figures 6A and S7A). The other two branches showing high expression of *VSX2* and *PAX6*, but different expression of *ASCL1*, were therefore annotated as multipotent and neurogenic RPCs. These two RPC branches collectively represented the whole RPC lineage. We found that *GJA1* and *JAG1*, two multipotent RPC markers, were downregulated with pseudotime progress in RPC lineage; the markers of neurogenic RPCs such as *ASCL1*, *NGN2*, and *DCX* were gradually upregulated (Figures S7B and S7C).

We then identified genes whose expression was dynamically changed over pseudotime in any branches. Unbiased hierarchical clustering classified 384 dynamically changed genes into four major clusters, each of which contains a set of genes showing similar expression pattern along the trajectory (Figure S8A). The first cluster consists of all genes that were specifically upregulated in neuronal branches and showed no significant change in RPC lineage (Figure 6B). Gene ontology analysis showed that these genes were enriched in biological processes such as “neuron differentiation” and “cell fate commitment,” suggesting their function in committing RPCs to retinal neurons (Figure 6C). Genes in cluster II maintained consistent expression in RPC and showed a transiently upregulated pattern at the branching point, enriched for the gene ontology terms, such as “nucleosome assembly,” “DNA replication,” and “chromosome segregation” (Figure S8B). A subset of linker histone H1 genes were also accumulated in this cluster, indicating the involvement of chromatin compaction prior to neuronal differentiation. Genes in the third and fourth clusters were upregulated in neurogenic RPCs compared with multipotent RPCs and were repressed in

the neuronal lineage after the cell-fate branching point. Many genes within these two clusters were related to cell proliferation, metabolic process, and embryonic morphogenesis, suggesting the function of these genes in maintaining retinal progenitor cell identity (Figures 6D and S8B). These results suggested that the single-cell trajectory recapitulated the developmental trajectory during human early retinogenesis.

Genes transiently upregulated at the bifurcation point where neuronal lineage separated from RPC lineage could have a critical function in promoting the commitment of RPCs. Using Monocle2, we found that many TFs, including *FOXN4*, *LHX2*, *NR2E1*, and *HES1*, were transiently upregulated directly before the lineage bifurcation point and then repressed in neuronal lineage (Figure 6F). Previous studies showed that *Foxn4* directs RPCs to amacrine or horizontal fate (Li et al., 2004). *LHX2* and *NR2E1* have been conventionally reported to maintain the proliferative competence and developmental pluripotency in the developing retina, but their function in RPC fate commitment during early retinogenesis is not known (Gordon et al., 2013; Miyawaki et al., 2004). Previous research showed that *Hes1* and *Hes5* are expressed in RPCs and can block neurogenic programming in RPCs by suppressing proneuronal basic helix-loop-helix gene expression, while *Hes6* was silent in RPCs and upregulated in terminally differentiated neurons (Zhang et al., 2018). Consistently in our data, we found that *HES1* and *HES5* were transiently activated in RPCs and then repressed in terminally differentiated neurons, and *HES6* were persistently upregulated in terminally differentiated neurons after the lineage bifurcation point (Figure 6E). Notably, our data showed that *HES1* was activated much earlier than *HES5*, which is confirmed by a recent study showing that *Hes1* was initially coexpressed with both *Ccnd1* and *Hes5* in the central developing retina, but only the expression of *Hes5* and not *Hes1* persists in the majority of differentiating RGCs (Riesenberg et al., 2018). Together, our data therefore indicated a sequential activation of *HES1* and then *HES5* during RPC commitment. It would be particularly interesting to elucidate the unique function of *HES1* and *HES5* separately in RPC commitment during early retinogenesis.

## DISCUSSION

The study of early retinal development in humans has been greatly hampered by the difficulty in obtaining early human retina and the heterogeneity of retinal tissue. Although the studies from model organisms have provided us with some hints about the retinal development in mammals, these results must be interpreted with caution because of the potential species difference in retinal

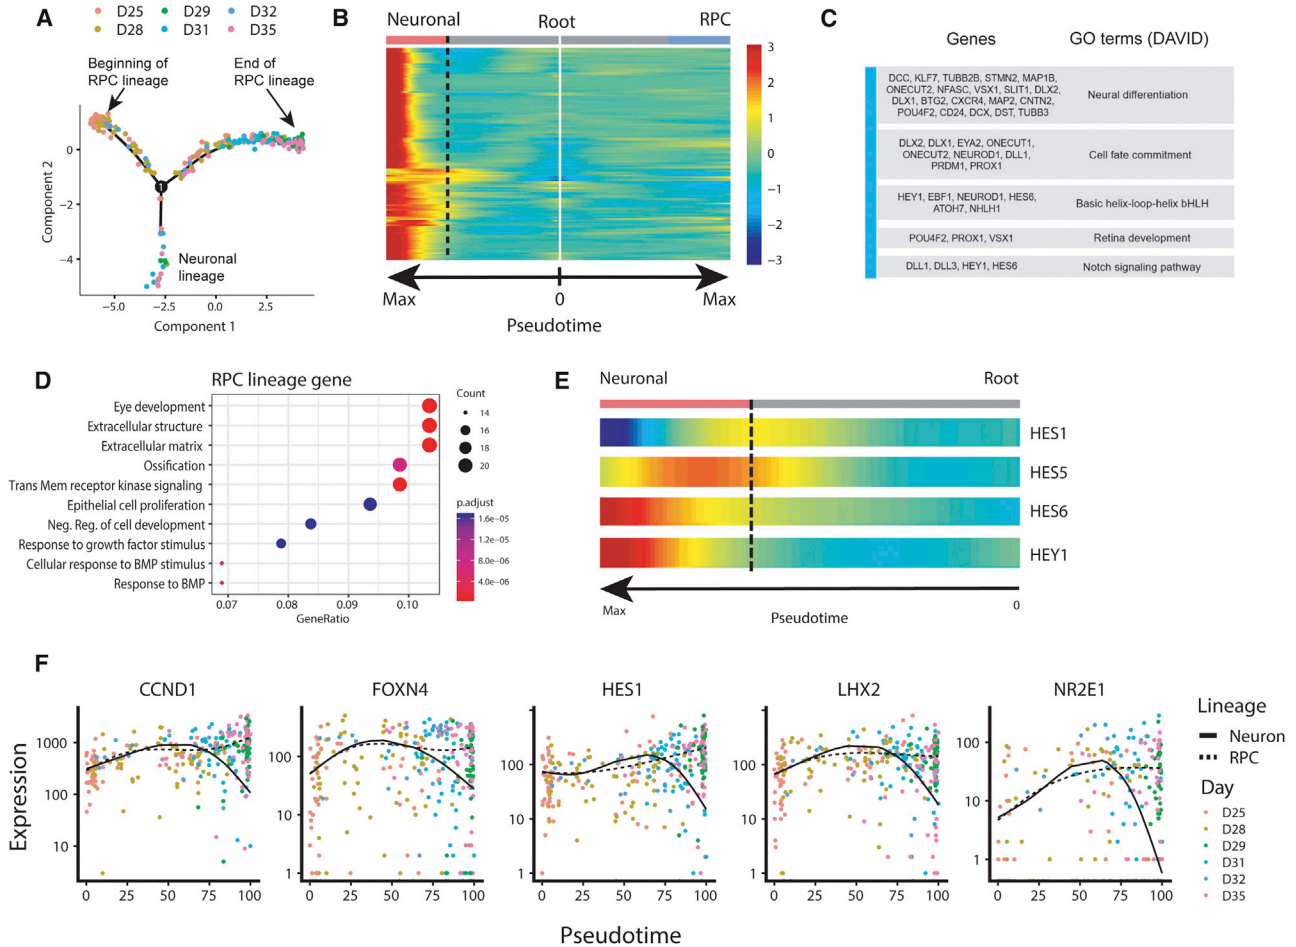

**Figure 6. Single-Cell Developmental Trajectory Analysis Using Monocle2**

(A) Using both RPCs and neuronal data to construct lineage bifurcation in hESC retinoids. Two lineages, representing RPC lineage and neuronal lineage, were identified.

(B) Heatmap showing the expression change of neuron-specific genes (genes classified into the first cluster) in both neuronal lineage and RPC lineage.

(C) Representative genes in the neuron-specific gene set and their functions.

(D) Functional enrichment of genes upregulated over pseudotime in RPC lineage.

(E) Expression of *HES1*, *HES5*, *HES6*, and *HEY1* in a neuronal lineage over pseudotime.

(F) Expression of genes that were transiently upregulated in RPC lineage. Dashed lines and solid lines show the smoothed expression over pseudotime in RPC lineage and neuronal lineage, respectively.

See also [Figures S7](#) and [S8](#).

development. To overcome these challenges, our study took advantage of hESC-derived 3D retinal culture, which allows us to study the very early retinal development with ultrahigh temporal and spatial resolution. With the power of scRNA-seq, we were able to directly measure the transcriptome dynamics within different cell types.

In this study we profiled transcriptional heterogeneity of RPCs during the onset of retinal neurogenesis, and identified a previous unknown transcriptomic transition in RPCs during the onset of retinal neurogenesis. Single-cell

analysis has revealed the involvement of the Wnt pathway in the regulation of this transition. The function of the canonical Wnt pathway was revealed long ago, which biases the RPC fate to retinal pigment epithelium and ciliary margin but not the neuroretina ([Fujimura, 2016](#)). Consistent with previous findings, in our data the canonical Wnt signaling was negatively regulated via the upregulation of *DKK3* along RPC progression. Interestingly, the Wnt receptor *FZD5* was revealed as the master hub gene in the gene-regulatory network of neurogenic RPCs, and





undergoes a progressive upregulation during RPC progression in our dataset using a human model. However, the functional studies of FZD5 revealed significant variance among different species. Therefore, our data of hESC-derived retinal organoids support the role for FZD5 in regulating human RPC commitment, which is not seen in model organisms such as mice and zebrafish.

Through gene coexpression analysis, novel genes correlated with the expression of *ASCL1* were identified, which have the potential to promote the neurogenic competence of RPCs. Intriguingly, *CCND1*, a progenitor-associated gene that positively regulates cell-cycle progression, was found to be upregulated in *ASCL1*<sup>+</sup> RPCs, and its overexpression significantly activate *ASCL1* expression in RPCs and promote downstream neurogenesis in a cell-cycle-independent way. Surprisingly, the phenotype of *CCND1* overexpression closely mirrored that in *Ccnd1* knockout mice, which exhibited the precocious cell-cycle exit of RPCs and the overproduction of RGCs (Das et al., 2009). These results indicated that *CCND1* was not only necessary for the progenitor maintenance but also essential for promoting neurogenesis, which is consistent with the finding in developing mouse spinal cord (Lukaszewicz and Anderson, 2011). The dual function was also implicated in other canonical progenitor genes, such as *LHX2*, *NR2E1*, and *HES5*, which were shown as transiently upregulated genes at the fate bifurcation point. Their neurogenic function has been revealed in many other neural systems by overexpression (Elmi et al., 2010; Subramanian et al., 2011). It would be of particular interest to also investigate their potential function in RPC commitment.

Regeneration of retinal neurons from Müller cells with adult stem cell characteristics is a promising therapy for retinal damage. However, recent strategies to enhance reprogramming of Müller cells into neurons were largely based on the mechanism of zebrafish Müller cell reprogramming after injury, which may not be suitable for the mammalian system. We found that the multipotent RPCs characterized in this study closely resembled adult NSCs but exhibited strong proliferative competence. We suggest that the comparison of the molecular properties between multipotent RPCs and Müller cells in a human model could provide hints about how to reactivate human retinal stem cells to enhance *in situ* regeneration of retinal neurons in the future.

## EXPERIMENTAL PROCEDURES

### hESC Culture and Retinal Organoid Differentiation

Human ESC lines H9 and H1 were kindly provided by Stem Cell Bank, Chinese Academy of Sciences. hESCs were maintained in Essential-8 (E8) medium (Invitrogen) on Vitronectin (VTN-N)-coated plates and passaged twice per week. Medium was changed

every day. To differentiate hESCs into 3D retinal organoid, we enzymatically lifted hESC colonies with dispase (2 mg/mL) into small cell clusters of about 100–150  $\mu$ m in diameter. The medium was switched from E8 to neural induction medium (DMEM/F12 [1:1], 1% N2 supplement, MEM nonessential amino acids, penicillin-streptomycin, and 2  $\mu$ g/mL heparin sulfate) gradually over the course of 4 days. On day 7, cell aggregates were attached to the plate with 10% fetal bovine serum (FBS). On day 16, neural rosettes were manually dissected from the plate and put in retinal differentiation medium (RDM: DMEM/F12 [3:1], 2% B27 supplement, MEM nonessential amino acids, and penicillin-streptomycin) to allow free-floating organoids to form. From day 30, RDM was supplemented with 10% FBS, 100  $\mu$ M taurine, 2 mM GlutaMAX, and 0.5  $\mu$ M retinoic acid for long-term differentiation. Recombinant human BMP4 (Stemgent) was added to the culture on day 6 to the final concentration of 50 ng/mL, which was diluted by a half medium change every third day to enhance the efficiency of retinal induction (Kuwahara et al., 2015).

### Immunocytochemistry

Retinal organoids were fixed in 4% paraformaldehyde for 30 min, cryoprotected overnight at 4°C in 30% sucrose, and cryosectioned. Frozen sections were incubated in blocking buffer (10% FBS, 2% donkey serum, and 0.2% Triton X-100 in PBS) for 1 h, followed by incubation with primary antibodies overnight at 4°C. Next day, sections were incubated with secondary antibodies at 1:1,000 (Alexa Fluor, Thermo Fisher) for 45 min. After washing and mounting, sections were imaged on a fluorescence microscope (Zeiss). Antibodies against the following proteins were used at the indicated dilutions: *ASCL1* (rabbit, 1:100, Abcam ab211327), *BLIMP1* (rat, 1:100, Santa Cruz Biotechnology sc-47732), *CCND1* (mouse, 1:100, Santa Cruz sc-8396), *DCX* (mouse, 1:100, Santa Cruz sc-271390), *ELAVL3/4* (mouse, 1:200, Molecular Probes MP21271), *GJA1* (mouse, 1:100, Santa Cruz sc-271837), *HES1* (rabbit, 1:200, Abcam ab71559), *ISLET1* (rabbit, 1:100, Abcam ab20670), *JAG1* (mouse, 1:100, Santa Cruz sc-390177), *Ki67* (mouse, 1:100, Abcam ab8191), *NEUROD1* (mouse, 1:100, Santa Cruz sc-46684), *NOTCH1* (rabbit, 1:100, Abcam ab27526), *PAX6* (rabbit, 1:500, Covance PRB-278P), *tdTomato* (goat, 1:200, Biorbyt orb182397), *VSX2* (sheep, 1:500, Millipore AB9016).

### Lentivirus Preparation and Organoid Infection

A lentivirus carrying both Tet-On 3G transactivator and TRE3GS promoter-mediated *CCND1* was purchased from HanBio to perform inducible *CCND1* overexpression. To perform lentiviral transduction on retinal organoids, we added 1 million lentiviral transducing units per retinal organoid to RDM at day 27 in the presence of 8  $\mu$ g/mL polybrene (Sigma). After incubation for 12 h, lentivirus particles were removed by changing the medium. To induce *CCND1* overexpression at day 28, we added 200 ng/mL doxycycline to the medium and maintained it for 4 days.

### Lineage Tracing

AAVS1-loxp-3Stop-loxp-tdTomato H9 ESC (Biocytogen, BCG-H9-009) was used for lineage tracing of multipotent RPC. On day 24, retinal organoids were transduced with lentivirus expressing CreERT2. One day post infection, 0.5  $\mu$ M 4-hydroxytamoxifen



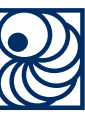

(Sigma) was added to the medium for 24 h. We collected organoids following tamoxifen treatment after 24 h and 7 days, respectively.

### scRNA-Seq Library Preparation and Analysis

The central neuroretina of retinal organoids were manually dissected and dissociated in Accutase (StemPro) for 30 min to create a single-cell suspension. Single cells were collected from two independent differentiation experiments. From the first batch, organoids were collected at day 25, day 28, day 31, and day 35; from the second batch, organoids were collected at day 26, day 29, day 32, and day 35. From each time point, 2–3 organoids were collected. This balanced sample-collection strategy can eliminate potential bias in data analysis that result from organoid differentiation batch effect. Cells were collected by centrifugation at  $300 \times g$  for 5 min and resuspended in 500  $\mu$ L of RDM. We used a mouth pipette to immediately transfer single cells into prepared lysis buffer. The scRNA-seq library was constructed following a modified Smart-seq2 protocol (Picelli et al., 2014). In detail, samples were incubated at 72°C for 3 min. The first-strand cDNA was reverse-synthesized using oligo(dT) and template-switching oligonucleotides. The synthesized first-strand cDNAs were amplified by 18 cycles. After purification, 0.1 ng of cDNA was used for Nextera tagmentation (Illumina) and library construction. Sequencing was performed on Illumina HiSeq 4000.

### scRNA-Seq Data Processing and Analysis

Single-cell libraries were pooled and sequenced on HiSeq 4000 aiming for 3 million reads per library on average, in pair-end 150-bp mode. Raw sequencing reads were demultiplexed, and trimmed using TrimGalore! Software. Trimmed data were aligned to Human reference Hg38 using the STAR 2.6.0 aligner with default parameters. Reads aligned to each gene were counted using featureCounts according to Gencode Hg38 gene annotation. Gene-expression data normalization, dimensional reduction, and data visualization were performed using customized R script and R package Seurat following the developer's instructions. Cell-cycle bias correction was performed using CellCycleScoring and ScaleData functions implemented in Seurat. In brief, each cell was assigned an "S Phase Score" and a "G2M Phase Score" using the strategy described by Tirosh et al. (2016), which is defined as the sum of bin-normalized expression of S-phase marker genes or G2M-phase marker genes, respectively. These two scores can be regarded as the quantitative representation of the cell-cycle phase of each single cell. The heterogeneity resulting from the cell cycle then can be removed from the data by regressing out the "S Phase Score" and a "G2M Phase Score" from the log-transformed RPM (gene read count per million mapped reads) matrix.

### ACCESSION NUMBERS

All scRNA-seq data reported in this paper are deposited in the Gene Expression Omnibus with accession number GEO: GSE122783.

### SUPPLEMENTAL INFORMATION

Supplemental Information can be found online at <https://doi.org/10.1016/j.stemcr.2019.08.012>.

### AUTHOR CONTRIBUTIONS

X.M., Q.A., Y.H., and G.F. conceived the idea, designed the study, and interpreted the results. X.M. and H.X. performed the experiments and generated the data. X.Z. helped with the culture of 3D retinal organoid. Q.A. performed bioinformatics analysis. Q.A. and X.M. wrote the manuscript. X.Y., S.Y., J.W., Q.L., and G.F. revised the manuscript.

### ACKNOWLEDGMENTS

This study was supported by the National Key R&D Program of China (2017YFA0104101, 2017YFC1001300), National Natural Science Foundation of China (81870694, 81770973, 81970821), Jiangsu Provincial Natural Science Foundation of China (BK20151586), Construction Program of Jiangsu Provincial Clinical Research Center Support System (BL2014084), Six Talent Peaks Project in Jiangsu Province (WSW-027) and the "333 Project" Research Projects of the Fifth Phase of Jiangsu Province (BRA2017548), NIH grants (R01DE025474, R01EY026319), CIRM Stem Cell Genomics Centers of Excellence Award CRP2, and an unrestricted grant from the Research to Prevent Foundation to the Department of Ophthalmology at University of California Los Angeles.

Received: April 2, 2019

Revised: August 22, 2019

Accepted: August 23, 2019

Published: September 19, 2019

### REFERENCES

- Agathocleous, M., and Harris, W.A. (2009). From progenitors to differentiated cells in the vertebrate retina. *Annu. Rev. Cell Dev. Biol.* 25, 45–69.
- Artegiani, B., de Jesus, D.A., Bragado, A.S., Brandl, E., Massalini, S., Dahl, A., and Calegari, F. (2015). Tox: a multifunctional transcription factor and novel regulator of mammalian corticogenesis. *EMBO J.* 34, 896–910.
- Baye, L.M., and Link, B.A. (2008). Nuclear migration during retinal development. *Brain Res.* 1192, 29–36.
- Bedford, L., Walker, R., Kondo, T., van Cruchten, I., King, E.R., and Sablitzky, F. (2005). Id4 is required for the correct timing of neural differentiation. *Dev. Biol.* 280, 386–395.
- Bharti, K., Gasper, M., Ou, J., Brucato, M., Clore-Gronenborn, K., Pickel, J., and Arnheiter, H. (2012). A regulatory loop involving PAX6, MITF, and WNT signaling controls retinal pigment epithelium development. *PLoS Genet.* 8, e1002757.
- Brzezinski, J.T., Kim, E.J., Johnson, J.E., and Reh, T.A. (2011). Ascl1 expression defines a subpopulation of lineage-restricted progenitors in the mammalian retina. *Development* 138, 3519–3531.
- Cattaneo, F., and Nucifora, G. (2008). EVI1 recruits the histone methyltransferase SUV39H1 for transcription repression. *J. Cell. Biochem.* 105, 344–352.
- Das, G., Choi, Y., Sicinski, P., and Levine, E.M. (2009). Cyclin D1 fine-tunes the neurogenic output of embryonic retinal progenitor cells. *Neural Dev.* 4, 15.



- Dulken, B.W., Leeman, D.S., Boutet, S.C., Hebestreit, K., and Brunet, A. (2017). Single-cell transcriptomic analysis defines heterogeneity and transcriptional dynamics in the adult neural stem cell lineage. *Cell Rep.* *18*, 777–790.
- Elmi, M., Matsumoto, Y., Zeng, Z.J., Lakshminarasimhan, P., Yang, W., Uemura, A., Nishikawa, S., Moshiri, A., Tajima, N., Agren, H., et al. (2010). TLX activates MASH1 for induction of neuronal lineage commitment of adult hippocampal neuroprogenitors. *Mol. Cell. Neurosci.* *45*, 121–131.
- Fujimura, N. (2016). WNT/beta-Catenin signaling in vertebrate eye development. *Front. Cell Dev. Biol.* *4*, 138.
- Gordon, P.J., Yun, S., Clark, A.M., Monuki, E.S., Murtaugh, L.C., and Levine, E.M. (2013). Lhx2 balances progenitor maintenance with neurogenic output and promotes competence state progression in the developing retina. *J. Neurosci.* *33*, 12197–12207.
- Hufnagel, R.B., Le, T.T., Riesenberger, A.L., and Brown, N.L. (2010). Neurog2 controls the leading edge of neurogenesis in the mammalian retina. *Dev. Biol.* *340*, 490–503.
- Kishi, Y., Fujii, Y., Hirabayashi, Y., and Gotoh, Y. (2012). HMGA regulates the global chromatin state and neurogenic potential in neocortical precursor cells. *Nat. Neurosci.* *15*, 1127–1133.
- Kuwahara, A., Ozone, C., Nakano, T., Saito, K., Eiraku, M., and Sai, Y. (2015). Generation of a ciliary margin-like stem cell niche from self-organizing human retinal tissue. *Nat. Commun.* *6*, 6286.
- Langfelder, P., and Horvath, S. (2008). WGCNA: an R package for weighted correlation network analysis. *BMC Bioinformatics* *9*, 559.
- Li, S., Mo, Z., Yang, X., Price, S.M., Shen, M.M., and Xiang, M. (2004). Foxn4 controls the genesis of amacrine and horizontal cells by retinal progenitors. *Neuron* *43*, 795–807.
- Liu, C., Baker, H., Li, T., and Swaroop, A. (2012). Regulation of retinal progenitor expansion by Frizzled receptors: implications for microphthalmia and retinal coloboma. *Hum. Mol. Genet.* *21*, 1848–1860.
- Lukaszewicz, A.I., and Anderson, D.J. (2011). Cyclin D1 promotes neurogenesis in the developing spinal cord in a cell cycle-independent manner. *Proc. Natl. Acad. Sci. U S A* *108*, 11632–11637.
- Maurer, K.A., Riesenberger, A.N., and Brown, N.L. (2014). Notch signaling differentially regulates Atoh7 and Neurog2 in the distal mouse retina. *Development* *141*, 3243–3254.
- Menuchin-Lasowski, Y., Oren-Giladi, P., Xie, Q., Ezra-Elia, R., Ofri, R., Peled-Hajaj, S., Farhy, C., Higashi, Y., Van de Putte, T., Kondoh, H., et al. (2016). Sip1 regulates the generation of the inner nuclear layer retinal cell lineages in mammals. *Development* *143*, 2829–2841.
- Miyawaki, T., Uemura, A., Dezawa, M., Yu, R.T., Ide, C., Nishikawa, S., Honda, Y., Tanabe, Y., and Tanabe, T. (2004). Tlx, an orphan nuclear receptor, regulates cell numbers and astrocyte development in the developing retina. *J. Neurosci.* *24*, 8124–8134.
- Morizur, L., Chicheportiche, A., Gauthier, L.R., Daynac, M., Bousin, F.D., and Mouchon, M.A. (2018). Distinct molecular signatures of quiescent and activated adult neural stem cells reveal specific interactions with their microenvironment. *Stem Cell Reports* *11*, 565–577.
- Nagao, M., Ogata, T., Sawada, Y., and Gotoh, Y. (2016). Zbtb20 promotes astrocytogenesis during neocortical development. *Nat. Commun.* *7*, 11102.
- Oppikofer, M., Bai, T., Gan, Y., Haley, B., Liu, P., Sandoval, W., Ciferri, C., and Cochran, A.G. (2017). Expansion of the ISWI chromatin remodeler family with new active complexes. *EMBO Rep.* *18*, 1697–1706.
- Picelli, S., Faridani, O.R., Bjorklund, A.K., Winberg, G., Sagasser, S., and Sandberg, R. (2014). Full-length RNA-seq from single cells using Smart-seq2. *Nat. Protoc.* *9*, 171–181.
- Poche, R.A., Furuta, Y., Chaboissier, M.C., Schedl, A., and Behringer, R.R. (2008). Sox9 is expressed in mouse multipotent retinal progenitor cells and functions in Muller glial cell development. *J. Comp. Neurol.* *510*, 237–250.
- Qiu, X., Mao, Q., Tang, Y., Wang, L., Chawla, R., Pliner, H.A., and Trapnell, C. (2017). Reversed graph embedding resolves complex single-cell trajectories. *Nat. Methods* *14*, 979–982.
- Riesenberger, A.N., Conley, K.W., Le, T.T., and Brown, N.L. (2018). Separate and coincident expression of Hes1 and Hes5 in the developing mouse eye. *Dev. Dyn.* *247*, 212–221.
- Saffary, R., and Xie, Z. (2011). FMRP regulates the transition from radial glial cells to intermediate progenitor cells during neocortical development. *J. Neurosci.* *31*, 1427–1439.
- Subramanian, L., Sarkar, A., Shetty, A.S., Muralidharan, B., Padmanabhan, H., Piper, M., Monuki, E.S., Bach, I., Gronostajski, R.M., Richards, L.J., et al. (2011). Transcription factor Lhx2 is necessary and sufficient to suppress astrogliogenesis and promote neurogenesis in the developing hippocampus. *Proc. Natl. Acad. Sci. U S A* *108*, E265–E274.
- Tirosh, I., Izar, B., Prakadan, S.M., Wadsworth, M.N., Treacy, D., Trombetta, J.J., Rotem, A., Rodman, C., Lian, C., Murphy, G., et al. (2016). Dissecting the multicellular ecosystem of metastatic melanoma by single-cell RNA-seq. *Science* *352*, 189–196.
- Trimarchi, J.M., Cho, S.H., and Cepko, C.L. (2009). Identification of genes expressed preferentially in the developing peripheral margin of the optic cup. *Dev. Dyn.* *238*, 2327–2329.
- Zhang, R., Engler, A., and Taylor, V. (2018). Notch: an interactive player in neurogenesis and disease. *Cell Tissue Res.* *371*, 73–89.
- Zhong, X., Gutierrez, C., Xue, T., Hampton, C., Vergara, M.N., Cao, L.H., Peters, A., Park, T.S., Zambidis, E.T., Meyer, J.S., et al. (2014). Generation of three-dimensional retinal tissue with functional photoreceptors from human iPSCs. *Nat. Commun.* *5*, 4047.

**Stem Cell Reports, Volume 13**

**Supplemental Information**

**Single-Cell RNA Sequencing of hESC-Derived 3D Retinal Organoids  
Reveals Novel Genes Regulating RPC Commitment in Early Human  
Retinogenesis**

**Xiyang Mao, Qin An, Huiyu Xi, Xian-Jie Yang, Xiangmei Zhang, Songtao Yuan, Jinmei Wang, Youjin Hu, Qinghuai Liu, and Guoping Fan**

## Supplemental figures

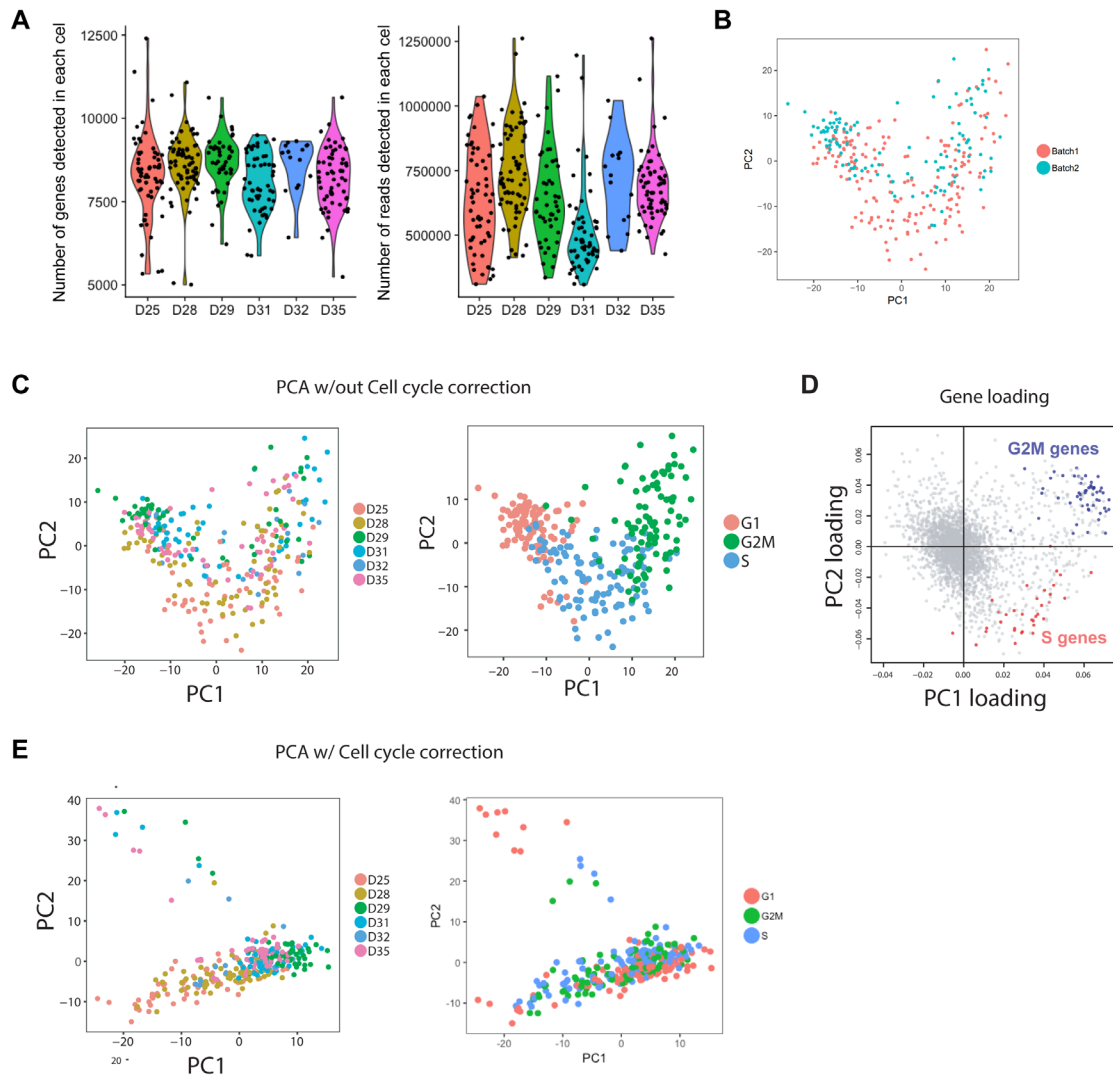

**Figure S1:** Sequencing and mapping of scRNA-seq data of 3D hESC-retinoids. **A:** Distribution of the genes and reads per single cell from different time points of differentiation. **B:** Scatterplot showing no obvious batch effect between the two batches of differentiation. **C:** PCA plot using transcriptomic data without cell-cycle bias correction. Cells were clustered by cell cycle phase. **D:** Scatter plot showing the PC loading score for each gene. Genes associated with PC loading showed that cell-cycle associated genes were highly variable and contributed most of the variation between single cells. **E:** PCA plot using the transcriptomic data after correcting cell-cycle bias. Cells at different cell cycle stages were presented in different colors. **Related to Figure 1.**



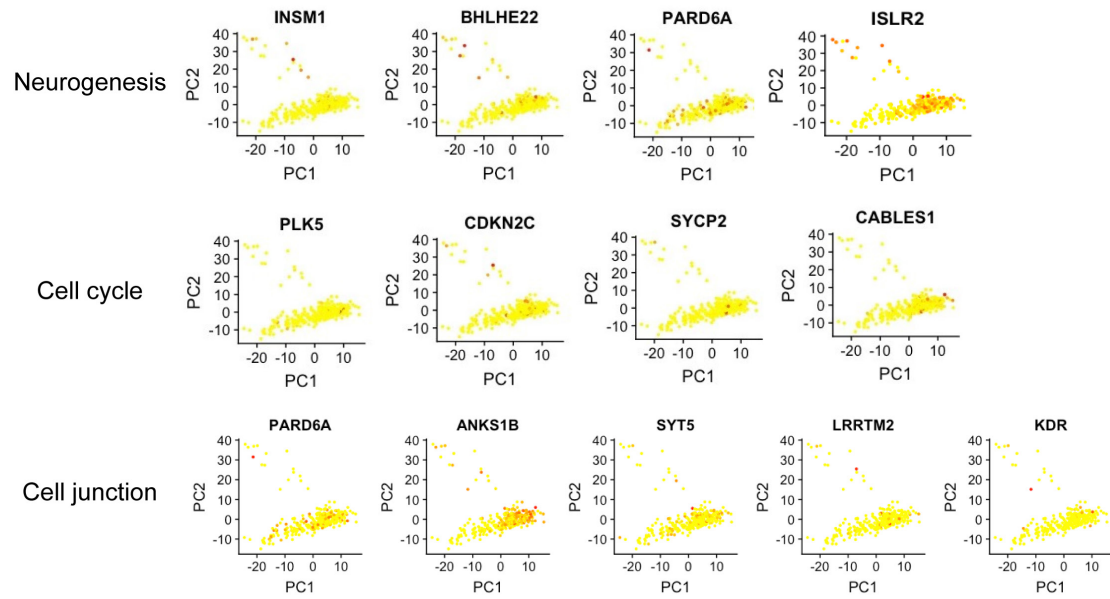

**Figure S2:** Expression pattern of additional ASCL1-correlated genes related to Neurogenesis (*INSM1*, *BHLHE22*, *PARD6A* and *ISLR2*), Cell-cycle (*PLK5*, *CDKN2C*, *SYCP2* and *CABLES1*) and Cell-junction (*PARD6A*, *ANKS1B*, *SYT5*, *LRRTM2* and *KDR*). **Related to Figure 2.**

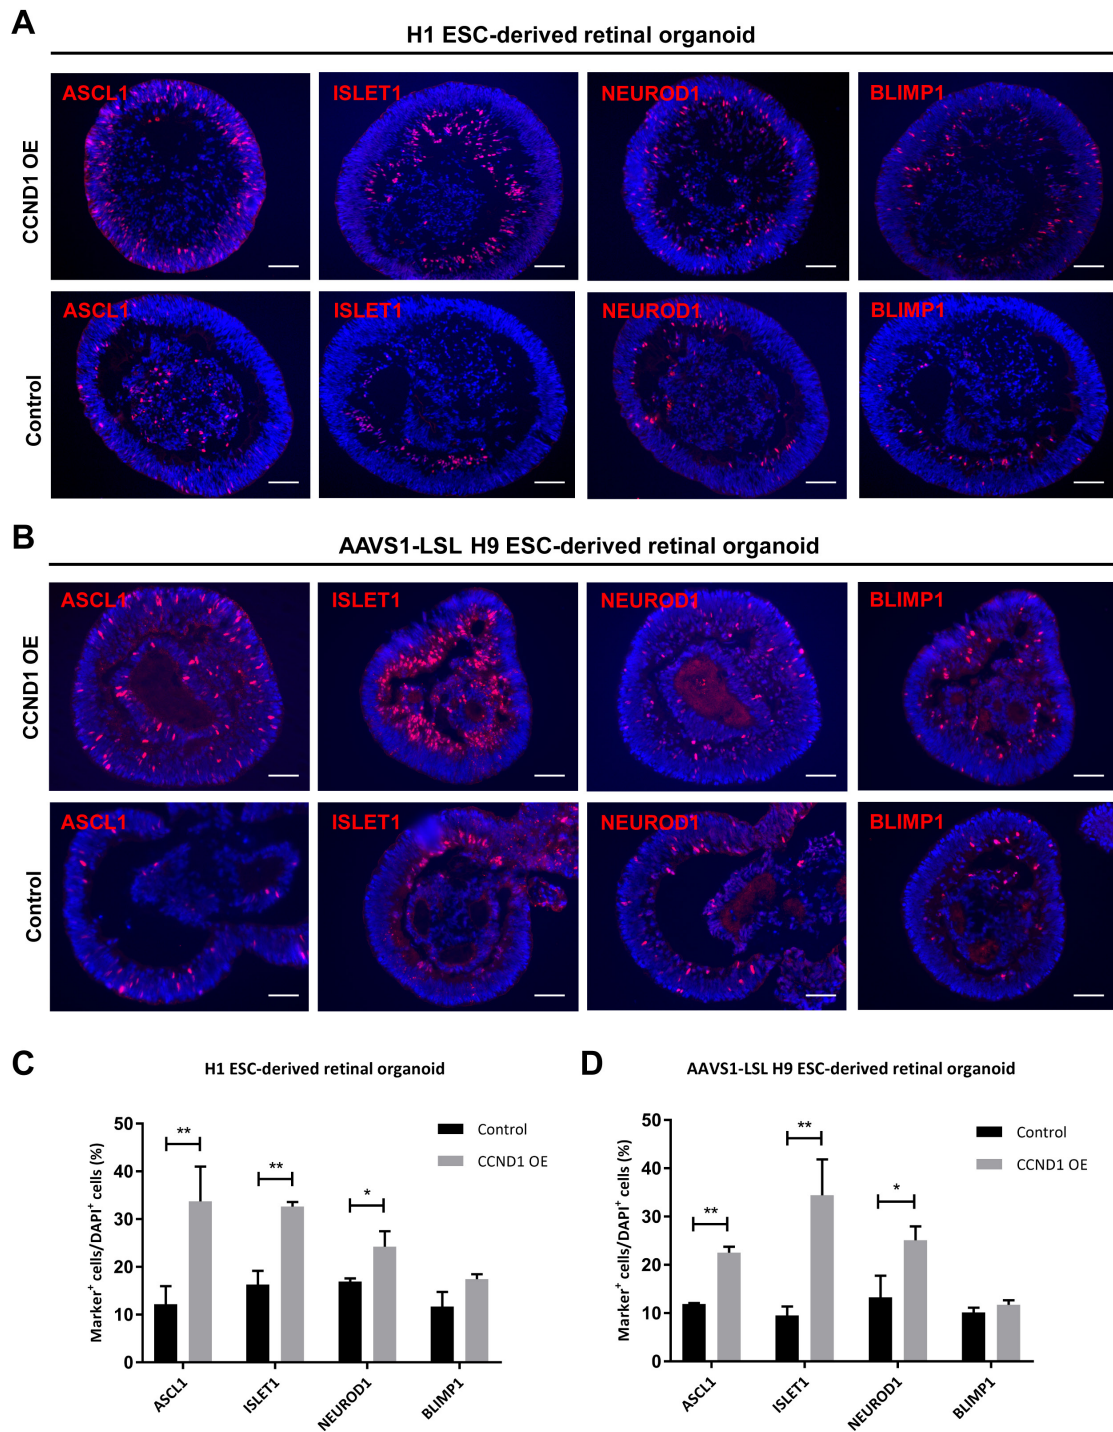

**Figure S3:** Similar results of CCND1 overexpression experiment were obtained in other hESC lines. **A-B:** Expression patterns of ASCL1, ISLET1, NEUROD1 and BLIMP1 in D32 CCND1-overexpressing (CCND1 OE) retinal organoids and control organoids derived from H1 ESC and AAVS1-loxp-3Stop-loxp-tdTomato (AAVS1-LSL) H9 ESC. Scale bars, 50  $\mu$ m. **C-D:** Quantification of Marker<sup>+</sup> cells in CCND1 OE retinal organoids and control organoids (mean  $\pm$  SD;  $n \geq 5$  organoids from 2 differentiations) at D32. \* $p < 0.05$ , \*\* $p < 0.001$ , unpaired t test. **Related to Figure 3.**

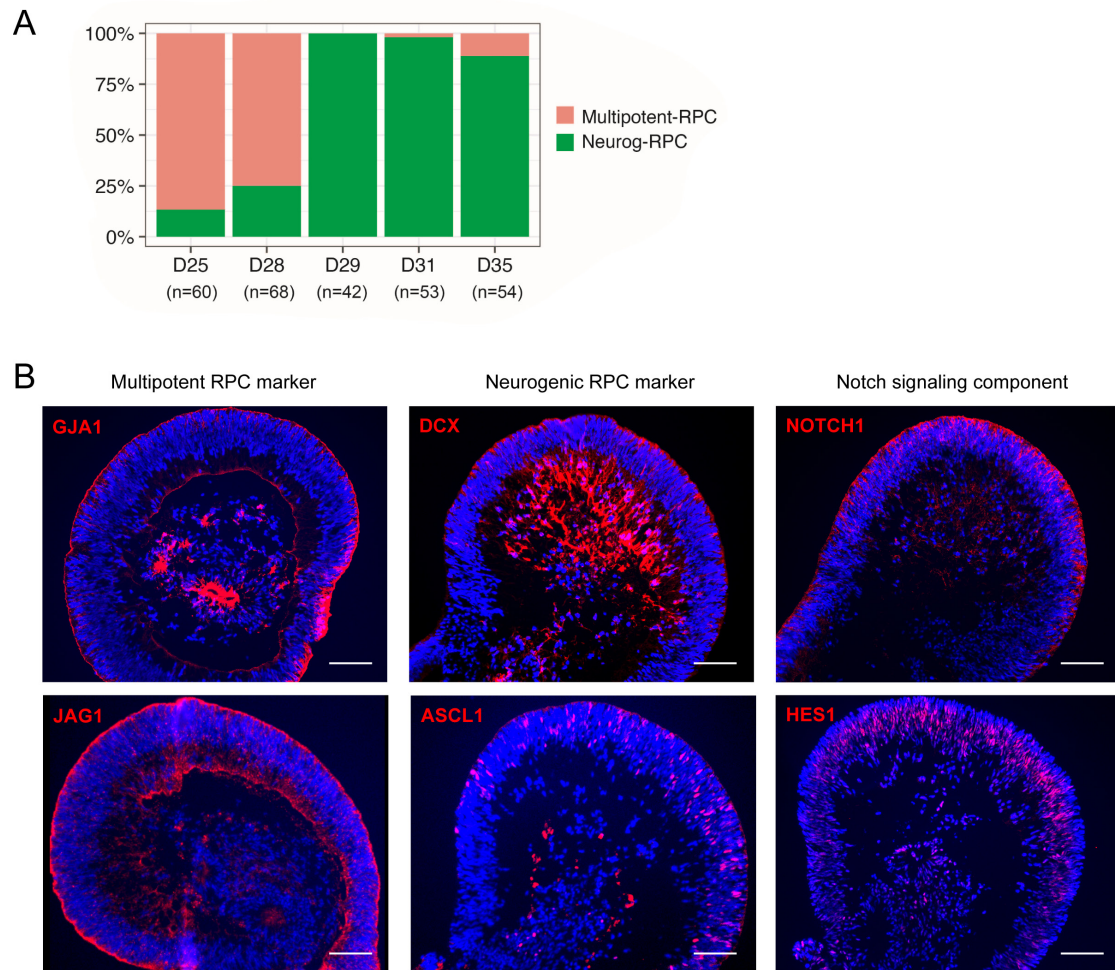

**Figure S4:** Molecular transition from multipotent RPC to neurogenic RPC during early retinogenesis. **A:** Stacked barplot showing the percentage of pluripotent RPCs and neurogenic RPCs at each time points. Most pluripotent RPCs were collected before D28 whereas most neurogenic RPCs were collected after D28. **B:** Immunostaining of multipotent RPC markers (JAG1 and GJA1), neurogenic RPC markers (DCX and ASCL1) and notch signaling components (NOTCH1 and HES1) showing a central-to-peripheral graded pattern at D40. Scale bars, 50  $\mu$ m. **Related to Figure 4.**

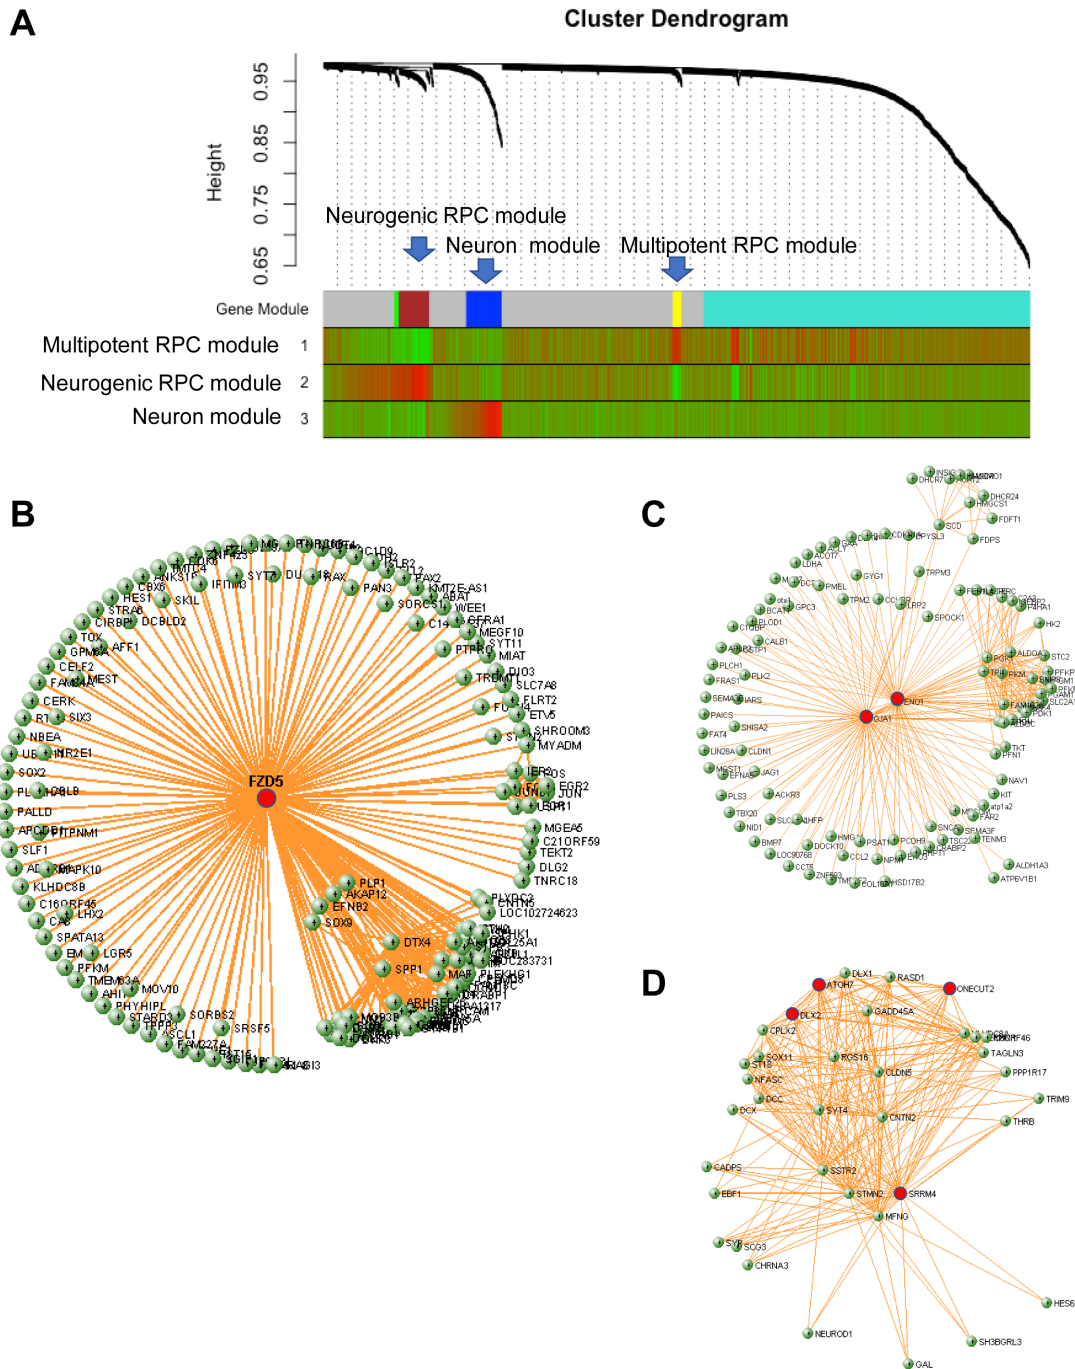

**Figure S5: WGCNA Network analysis of RPC progression in early retinogenesis. A:** On top, hierarchical cluster tree showed co-expression relationship between each gene. The “Gene Module” color bar shows the assignment of each gene to modules. The grey means the gene cannot be assigned into any significant co-expression module. The bottom 3 bars show the correlation between each gene and the cell types. Red means a gene is positively correlated with a cell type label, therefore trend to be highly expressed in this cell type. Green means a gene is negatively correlated with a cell type label, therefore trend to be repressed in this cell type. **(B-D):** Visualization of network topological structure in neurogenic module (B), multipotent RPC module (C) and neuronal module (D).



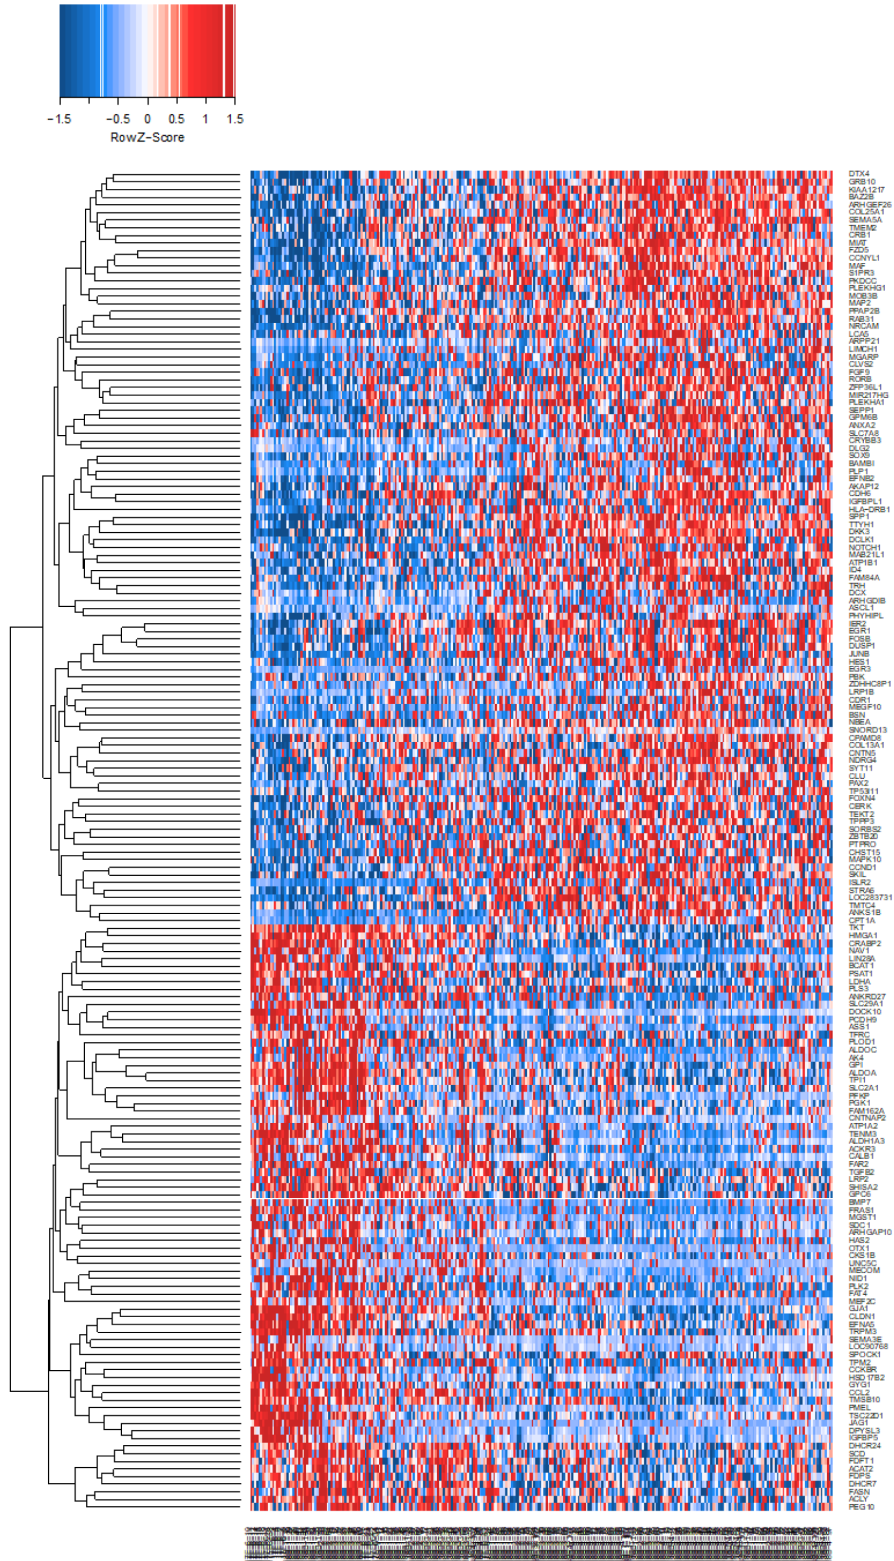

**Figure S6:** Pseudotime analysis of RPC progression using principle curve method. Heatmap of differential expression genes positively or negatively correlated with the pseudotime of RPC progression. **Related to Figure 5.**

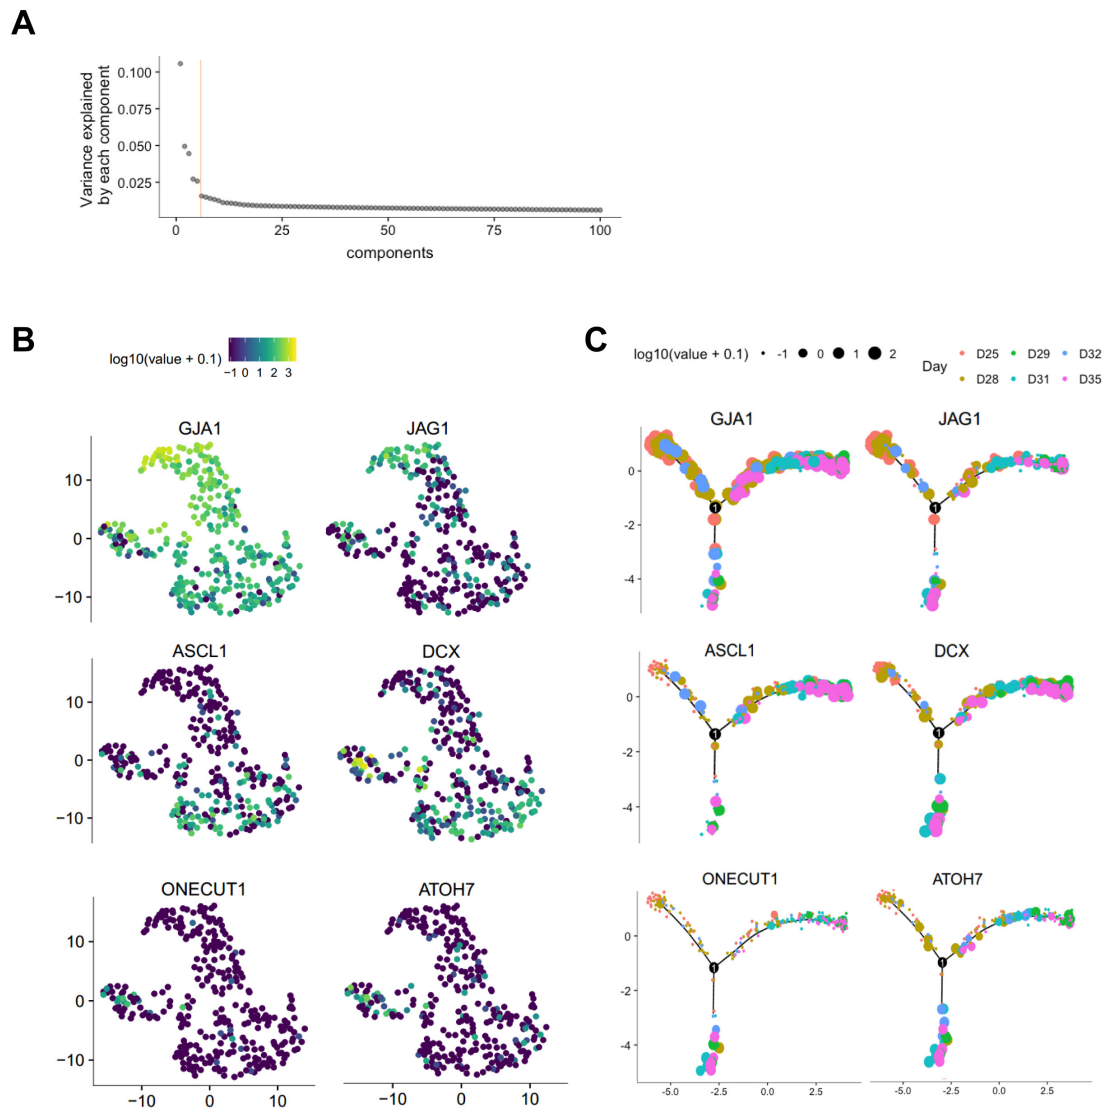

**Figure S7:** Pseudotime analysis of all single cells using Monocle 2. **A:** Contribution of each PCs to explain the total variance. The first 5 PCs were used for t-SNE dimensional reduction when running Monocle2. **B:** t-SNE plots generated by Monocle2 using top 5 most significant PC. Colors of each cell shows the normalized expression levels ( $\log_{10}[\text{value}+0.1]$ ) of *GJA1*, *JAG1*, *ASCL1*, *DCX*, *ONECUT1* and *ATOH7*. **C:** Gene expression pattern on the trajectory generated by Monocle 2. The size of each cell shows the normalized expression levels ( $\log_{10}[\text{value}+0.1]$ ) of *GJA1*, *JAG1*, *ASCL1*, *DCX*, *ONECUT1* and *ATOH7*. **Related to Figure 6.**

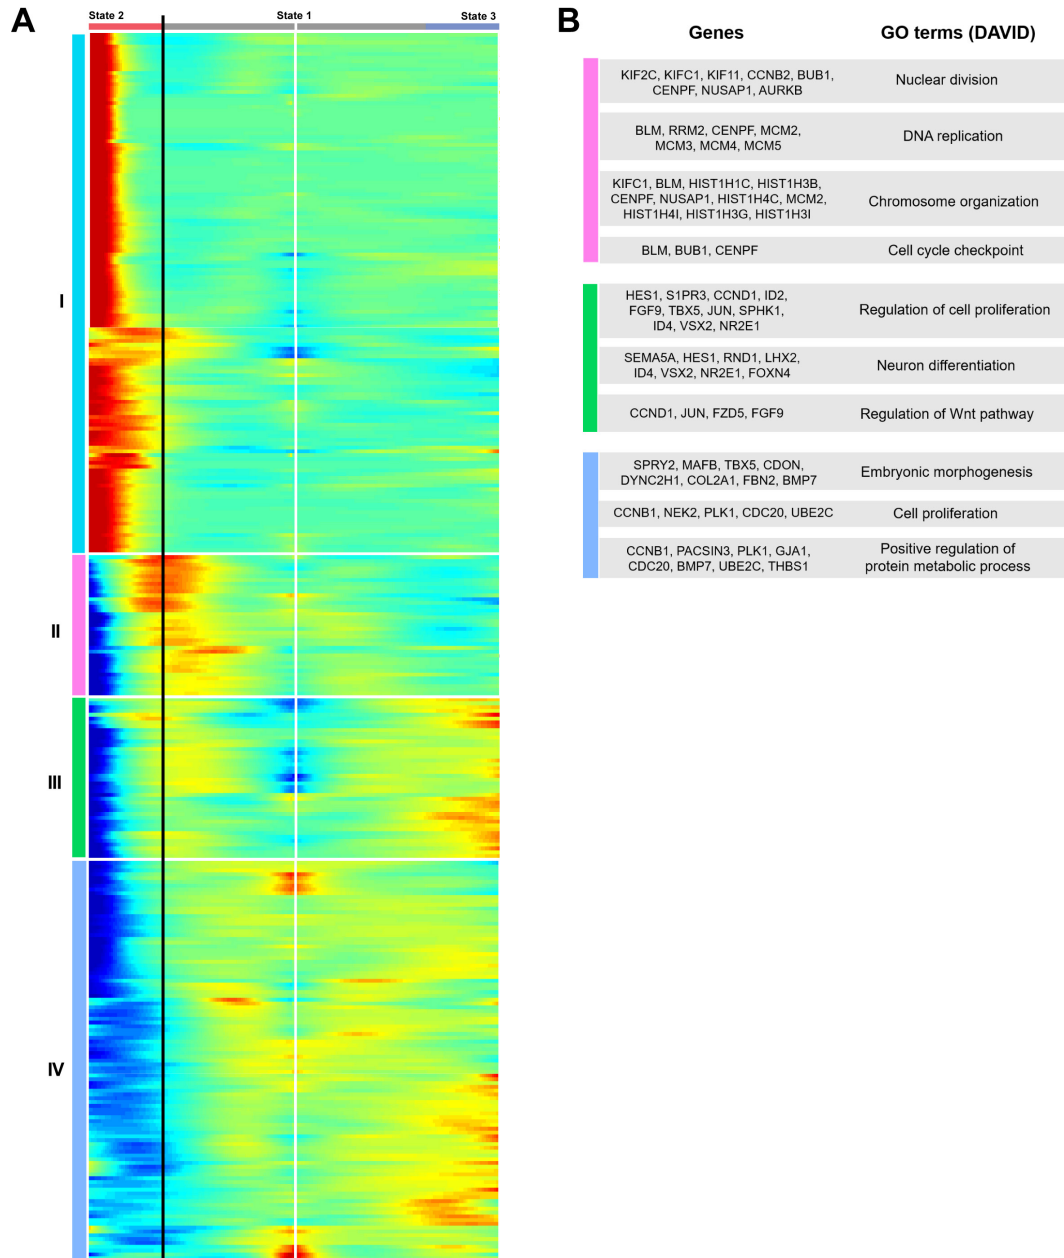

**Figure S8:** Differential expression analysis along pseudotime generated by Monocle 2. **A:** Heatmap showing the expression pattern of 384 genes that were dynamically expressed along the pseudotime, in neuronal or RPC lineage. Blue means low expression, green means moderate expression and red means high expression. 384 genes were unbiasedly classified into 4 clusters based on their expression pattern. **B:** Gene ontology enrichment of genes in each of the 4 clusters and the corresponding representative genes. **Related to Figure 6.**

## **Supplemental Tables**

Table S1: Top 100 genes with highest Spearman correlation with ASCL1 in RPCs. Related to Figure 2.

Table S2: Differential expressed genes in the 3 RPC clusters (Cluster 1, 3 and 5) identified in the initial unbiased clustering. Related to Figure 4.
